# Supplementary material for: Differential effects of organic nitrates on arterial diameter among healthy Japanese participants with different mitochondrial aldehyde dehydrogenase 2 genotypes: randomised crossover trial
Source: PubMed Central journal article supplement — BMJ Open. 2011 Jul 18;1(1):e000133. doi: 10.1136/bmjopen-2011-000133 (PMC3191425; doi:10.1136/bmjopen-2011-000133), 2011-07-18
Supplement: bmjopen-2011-000133.draft_revisions.pdf [file bmjopen-2011-000133.draft_revisions.pdf]

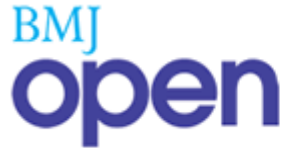

**Differential effects of organic nitrates on arterial diameter among healthy Japanese participants with different mitochondrial aldehyde dehydrogenase 2 genotypes: randomised crossover trial**

|                               |                                                                                                                                                                                                                                                                                                                                                                                                                                                                                                                                                                                                                                                                                                                                                                                                                                                                                |
|-------------------------------|--------------------------------------------------------------------------------------------------------------------------------------------------------------------------------------------------------------------------------------------------------------------------------------------------------------------------------------------------------------------------------------------------------------------------------------------------------------------------------------------------------------------------------------------------------------------------------------------------------------------------------------------------------------------------------------------------------------------------------------------------------------------------------------------------------------------------------------------------------------------------------|
| Journal:                      | <i>BMJ Open</i>                                                                                                                                                                                                                                                                                                                                                                                                                                                                                                                                                                                                                                                                                                                                                                                                                                                                |
| Manuscript ID:                | bmjopen-2011-000133                                                                                                                                                                                                                                                                                                                                                                                                                                                                                                                                                                                                                                                                                                                                                                                                                                                            |
| Article Type:                 | Research                                                                                                                                                                                                                                                                                                                                                                                                                                                                                                                                                                                                                                                                                                                                                                                                                                                                       |
| Date Submitted by the Author: | 30-Mar-2011                                                                                                                                                                                                                                                                                                                                                                                                                                                                                                                                                                                                                                                                                                                                                                                                                                                                    |
| Complete List of Authors:     | Sakata, Satoko; Kyushu University, Department of Medicine and Clinical Science, Faculty of Medical Sciences<br>Yoshihara, Tatsuya; Kyushu University, Department of Clinical Pharmacology, Faculty of Medical Sciences<br>Arima, Hisatomi; The University of Sydney, George Institute for Global Health<br>Shiraishi, Fumie; Kyushu University, Department of Clinical Pharmacology, Faculty of Medical Sciences<br>Oniki, Hideyuki; Kyushu University, Department of Medicine and Clinical Science, Faculty of Medical Sciences<br>Takahashi-Yanaga, Fumi; Kyushu University, Department of Clinical Pharmacology, Faculty of Medical Sciences<br>Matsumura, Kiyoshi; Kyushu University, Department of Medicine and Clinical Science, Faculty of Medical Sciences<br>Sasaguri, Toshiyuki; Kyushu University, Department of Clinical Pharmacology, Faculty of Medical Sciences |
| <b>Subject Heading</b>:       | Cardiovascular medicine                                                                                                                                                                                                                                                                                                                                                                                                                                                                                                                                                                                                                                                                                                                                                                                                                                                        |
| Keywords:                     | Coronary heart disease < CARDIOLOGY, Vascular medicine < INTERNAL MEDICINE, Clinical trials < THERAPEUTICS, Ischaemic heart disease < CARDIOLOGY, CLINICAL PHARMACOLOGY                                                                                                                                                                                                                                                                                                                                                                                                                                                                                                                                                                                                                                                                                                        |
|                               |                                                                                                                                                                                                                                                                                                                                                                                                                                                                                                                                                                                                                                                                                                                                                                                                                                                                                |

SCHOLARONE™  
Manuscripts

1  
2  
3  
4  
5  
6  
7 **Differential effects of organic nitrates on arterial diameter among healthy Japanese**  
8 **participants with different mitochondrial aldehyde dehydrogenase 2 genotypes:**  
9 **randomised crossover trial**  
10  
11

12  
13  
14 Satoko Sakata,<sup>2</sup> Tatsuya Yoshihara,<sup>1</sup> Hisatomi Arima,<sup>3</sup> Fumie Shiraishi,<sup>1</sup> Hideyuki Oniki,<sup>2</sup> Fumi  
15 Takahashi-Yanaga,<sup>1</sup> Kiyoshi Matsumura,<sup>2</sup> Toshiyuki Sasaguri<sup>1</sup>  
16  
17  
18

19  
20  
21 <sup>1</sup>Department of Clinical Pharmacology, Faculty of Medical Sciences, Kyushu University,  
22 Fukuoka 812-8582, Japan  
23

24  
25 <sup>2</sup>Department of Medicine and Clinical Science, Faculty of Medical Sciences, Kyushu University,  
26 Fukuoka 812-8582, Japan  
27

28  
29 <sup>3</sup>George Institute for Global Health, The University of Sydney, Sydney 2050, Australia  
30  
31

32  
33 Correspondence to:

34 Toshiyuki Sasaguri, MD, PhD

35  
36 Department of Clinical Pharmacology, Faculty of Medical Sciences, Kyushu University

37  
38 Maidashi 3-1-1, Higashi-ku, Fukuoka 812-8582, Japan

39  
40 Tel.: +81-92-642-6080 or 6082

41  
42 Fax: +81-92-642-6084

43  
44 E-mail: sasaguri@med.kyushu-u.ac.jp  
45  
46  
47  
48  
49  
50  
51  
52  
53  
54  
55  
56  
57  
58  
59  
60

## ABSTRACT

**Objectives** To determine whether polymorphisms at codon 487 (\*1, GAA=Glu; \*2, AAA=Lys) of mitochondrial aldehyde dehydrogenase 2 (ALDH2) influence nitroglycerin (glyceryl trinitrate [GTN])-induced vasodilation, and whether GTN or isosorbide dinitrate (ISDN) is a more effective antianginal agent in each ALDH2 genotype.

**Design** Randomised, open-label, crossover trial with 117 healthy Japanese (20–39 years) whose genotypes were determined (\*1/\*1, n=47; \*1/\*2, n=48; \*2/\*2, n=22) was performed at Kyushu University Hospital, Fukuoka, Japan. Participants were randomly assigned to treatment: sublingual spray of GTN (0.3 mg) or ISDN (1.25 mg). After  $\geq 1$  week, measurements were repeated using the other drug. Main outcome measures were the maximal rate of increase in the brachial artery diameter determined by ultrasonography, the time required to attain maximal dilation ( $T_{\max}$ ), and the time required to attain 90% maximal dilation ( $T_{0.9}$ ).

**Results** Maximal artery diameter increase in response to GTN or ISDN did not differ among genotypes. However, GTN  $T_{\max}$  was significantly longer for \*2/\*2 (299.7 sec, 269.0–330.4) than \*1/\*1 (254.7 sec, 238.6–273.4;  $P=0.0190$ ). GTN  $T_{0.9}$  was significantly longer in the \*1/\*2 (206.1 sec, 191.7–219.3) and \*2/\*2 (231.4 sec, 211.8–251.0) genotypes than \*1/\*1 (174.9 sec, 161.5–188.3;  $P=0.0068$ ,  $P<0.0001$ , respectively). In contrast, the time-course of ISDN-induced vasodilation did not differ among genotypes. GTN  $T_{\max}$  and  $T_{0.9}$  among \*1 allele carriers (\*1/\*1 and \*1/\*2) were significantly shorter than those of ISDN, whereas the time course of GTN and ISDN vasodilation did not differ among participants carrying \*2/\*2.

**Conclusions** The amplitude of GTN-induced vasodilation was not influenced by ALDH2 genotype, but response was significantly delayed in \*2 allele carriers, especially \*2/\*2. GTN dilated the artery more quickly than ISDN in \*1/\*1 and \*1/\*2, but not in \*2/\*2.

**Trial registration number** UMIN000001492 (UMIN-CTR database).

## ARTICLE SUMMARY

### Article focus

- There were few reliable human studies on the influence of aldehyde dehydrogenase 2 (ALDH2) polymorphisms at codon 487 on the response to nitroglycerin (GTN). In particular, there was no information about the response to GTN in \*2/\*2 homozygotes.
- It was unclear whether GTN or isosorbide dinitrate (ISDN) is a more effective antianginal agent in each ALDH2 genotype.
- We aimed at comparing vasodilation induced by GTN and ISDN in individuals with different ALDH2 genotypes.

### Key messages

- Maximal rate of increase in arterial diameter after GTN treatment did not differ among ALDH2 genotype groups.
- Time required to attain 90% maximal vasodilation was longer in the \*1/\*2 and \*2/\*2 groups than in the \*1/\*1 group.
- GTN (0.3 mg) induced vasodilation more rapidly than ISDN (1.25 mg) in the \*1/\*1 and \*1/\*2 groups, but there was no difference between GTN and ISDN in the \*2/\*2 group.

### Strengths and limitations of this study

- Choice of healthy young individuals as participants may have strengthened the validity of the study; the participants' backgrounds were likely to be more homogeneous by excluding the influence of multiple concomitant factors that could not be controlled when studying patients or older subjects. However, results could have been different if the study had been performed with patients with angina, because hemodynamic changes in patients might alter the response to nitrates.
- A randomised crossover design was used and arterial diameter was determined by a single measurer blinded to genotype. However, the participants and investigators were not blinded to treatment.
- Arterial diameter was accurately measured using a semiautomatic ultrasonography

1  
2  
3  
4  
5  
6  
7 system. However, the brachial artery diameter was measured instead of the coronary  
8  
9 artery diameter, and moreover, we did not evaluate venous dilation.  
10  
11  
12  
13  
14  
15  
16  
17  
18  
19  
20  
21  
22  
23  
24  
25  
26  
27  
28  
29  
30  
31  
32  
33  
34  
35  
36  
37  
38  
39  
40  
41  
42  
43  
44  
45  
46  
47  
48  
49  
50  
51  
52  
53  
54  
55  
56  
57  
58  
59  
60

For peer review only

## INTRODUCTION

Nitroglycerin (glyceryl trinitrate [GTN]) has been the drug of choice to relieve angina pectoris since 1879 when William Murrell published his results on the clinical effect of GTN.<sup>1</sup> However, the effectiveness of GTN is not consistent among individual patients.<sup>2</sup> A sublingual 0.3 mg dose of GTN typically alleviates chest pain, but some patients require a larger dose or repeated administration. The reason for this differential effect may be complex, since several biological processes are involved in mediating the pharmacological effects of GTN. GTN is a prodrug that must be reduced to glyceryl dinitrate to generate nitrite, which is further reduced to nitric oxide (NO). NO is the active metabolite that relaxes vascular smooth muscle by stimulating soluble guanylate cyclase to produce cyclic guanosine monophosphate (cGMP).<sup>3,4</sup> Proposed mechanisms for GTN bioactivation include the non-enzymatic interaction with thiol compounds such as cysteine and N-acetylcysteine<sup>5</sup> and enzymatic reaction such as glutathione S-transferase<sup>6-8</sup> and cytochrome P450;<sup>8,9</sup> however, the relative importance of these mechanisms had not been understood until recently.

In 2002, Chen et al<sup>10</sup> identified mitochondrial aldehyde dehydrogenase 2 (ALDH2) as an important enzyme for GTN bioactivation.<sup>11</sup> They purified a protein fraction able to metabolise <sup>14</sup>C-GTN and sequenced its amino acids.<sup>10</sup> Subsequently, they showed that ALDH2 was essential for GTN metabolism using ALDH2 knockout mice.<sup>12</sup> They performed additional in vivo experiments in dogs to demonstrate the role of ALDH2 in GTN bioactivation.<sup>13</sup> These findings were supported by clinical studies. Mackenzie et al<sup>14</sup> reported that the effect of GTN administered by intra-arterial injection was 33% lower in healthy volunteers if the ALDH2 inhibitor disulfiram was given. The loss-of-function single nucleotide polymorphism at codon 487 of ALDH2, in which Glu (GAA, \*1) is replaced with Lys (AAA, \*2), is common in East Asian populations including Japanese. In an in vitro assay, the GTN reductase activity of ALDH2 \*2 was shown to be two orders of magnitude lower than that of the wild type enzyme.<sup>10</sup> Therefore, Mackenzie et al<sup>14</sup> evaluated the effect of GTN in 11 Asian \*2 allele carriers (\*1/\*2 and \*2/\*2) and found it was 40% lower than its effect in carriers of \*1/\*1. Li et al<sup>16</sup> reported

1  
2  
3  
4  
5  
6  
7  
8  
9  
10  
11  
12  
13  
14  
15  
16  
17  
18  
19  
20  
21  
22  
23  
24  
25  
26  
27  
28  
29  
30  
31  
32  
33  
34  
35  
36  
37  
38  
39  
40  
41  
42  
43  
44  
45  
46  
47  
48  
49  
50  
51  
52  
53  
54  
55  
56  
57  
58  
59  
60

that the effect of sublingual GTN was significantly lower in \*2 allele carriers than in \*1/\*1 carriers among Chinese patients with angina; however, it is unclear whether this decrease in sensitivity to GTN should be considered in medical practice. Further, the sensitivity to GTN of \*2/\*2 carriers should be distinguished from that of \*1/\*2 carriers, since the number of \*2/\*2 carriers included in previous studies was too small to be independently analysed. It is unknown whether another drug may be more effective for \*2/\*2 patients. In Japan, isosorbide dinitrate (ISDN) is the only alternative to GTN available for sublingual administration during anginal attacks. Since bioactivation of ISDN appears to be mediated by cytochrome P450 but not ALDH2,<sup>9 17</sup> we wanted to compare the effectiveness of GTN and ISDN in individuals with different ALDH2 polymorphisms.

To answer these questions, we conducted a randomised crossover study to compare the vasodilation effect of GTN with that of ISDN in healthy young Japanese participants, including sufficient numbers of each ALDH2 genotype.

## METHODS

### Study design

From September 2009 to May 2010, we performed this randomised, open-label, crossover trial at Kyushu University Hospital, Fukuoka, Japan with volunteers whose ALDH2 genotypes were determined. After an initial treatment with a standard therapeutic dose of either GTN (0.3 mg) or ISDN (1.25 mg), the brachial artery diameter was continuously measured by ultrasonography. After  $\geq 1$  week, the participants received the other drug, and the measurements were repeated. Main outcome measures were the maximal rate of diameter increase, the time required to attain maximal dilation ( $T_{\max}$ ), and the time required to attain 90% of maximal dilation ( $T_{0.9}$ ).

### Participants

From April 2009 to March 2010, we recruited Japanese men and women (20-39 years old) among the students and staff of Kyushu University for participation in the study, and selected the final participants based on ALDH2 genotype. Persons who met the following criteria were excluded: 1) requiring treatment for a disease, 2) under medical treatment, 3) history of cardiovascular disease, 4) serious liver damage, 5) serious renal damage, 6) pregnancy, 7) history of adverse reaction to an organic nitrate, 8) receiving phosphodiesterase-5 inhibitors (sildenafil, vardenafil, or tadalafil), 9) systolic blood pressure  $< 90$  mmHg, 10) body weight  $< 40$  kg or  $> 90$  kg, or 11) judged to be inappropriate for participation in the study by the principal investigator (TS).

### Genotyping

Genomic DNA was extracted from peripheral blood with a DNA isolation kit (GenTLE™; Takara Bio Inc, Ohtsu, Japan); for the 11 participants who did not wish to have blood drawn, DNA was extracted from saliva with a DNA self-collection kit (Oragene™; DNA Genotek, Ottawa, Canada). DNA extraction was carried out with the kits according to the manufacturers'



1  
2  
3  
4  
5  
6  
7 instructions. ALDH2 genotypes at codon 487 were determined by polymerase chain reaction  
8 (PCR) and restriction fragment length polymorphism analysis. PCR primer sequences were  
9 5'-TTGGTGGCTACAAGATGTCG-3' (forward) and 5'-AAACACTGATGGCCTCAAGC-3'  
10 (reverse). The 324-bp PCR products were digested with *TspRI* (New England BioLabs Inc,  
11 Ipswich, USA) at 65°C for 20 min. The restriction digest cut the \*1 genotype DNA into three  
12 fragments (68, 255, and 1 bp) and the \*2 genotype DNA into two fragments (323 and 1 bp),  
13 which were separated on a 3% agarose gel and visualised with ethidium bromide. Genotypes  
14 were determined by the existence of 255-bp and/or 323-bp fragments.  
15  
16  
17  
18  
19  
20  
21  
22  
23  
24

#### 25 Interventions and outcome measures

26  
27 Participants were prohibited from drinking alcohol and smoking cigarettes the night before  
28 testing, but meals were not restricted. After spending at least 60 min without exercise,  
29 participants were randomly assigned 1:1 to a single sublingual spray administration of GTN (0.3  
30 mg; Myocor<sup>®</sup> spray, Toa Eiyo Ltd, Tokyo, Japan) or ISDN (1.25 mg; Nitorol<sup>®</sup> spray, Eisai Co  
31 Ltd, Tokyo, Japan) as initial treatment. A random allocation sequence was made by HA using  
32 random digits generated by the Mersenne Twister method<sup>18</sup> and conveyed to the investigators  
33 (SS, TY, HO, and TS) by sealed numbered envelopes, one for each participant, with instructions  
34 to use the envelopes in numerical order. Participants rested at least 5 min in a supine position in  
35 a quiet examination room at 24°C, and then the right brachial artery was scanned in a  
36 longitudinal section 1 to 10 cm above the elbow in an arm maintained in the same position  
37 throughout the study, with a 10-MHz linear array transducer probe. To determine the maximal  
38 diameter of the artery, the end-diastolic diameter (length from one side of the media-adventitia  
39 interface to the other side) coincident with the R-wave on a monitoring electrocardiogram was  
40 continuously measured from 30 sec before nitrate administration to 10 min after administration.  
41 This measurement was performed using a semiautomatic high-resolution B-mode ultrasound  
42 imaging system (UNEX EF 18G II, UNEX Corporation, Nagoya, Japan)<sup>19 20</sup> by a single expert  
43 (SS) blinded to genotype and recorded on a hard disk. Pulse rate and blood pressure were  
44  
45  
46  
47  
48  
49  
50  
51  
52  
53  
54  
55  
56  
57  
58  
59  
60

1  
2  
3  
4  
5  
6  
7 measured every 5 min. More than 7 days later, each participant received the other drug, and the  
8  
9 measurements were repeated. The prespecified primary outcome measures were the maximal  
10  
11 rate of increase in brachial artery diameter and the time required to attain maximal dilation  
12  
13 ( $T_{\max}$ ). However, the time required to attain 90% maximal dilation ( $T_{0.9}$ ) was also determined, so  
14  
15 as to minimise fluctuation of the outcome measure. In addition, changes in pulse rate and blood  
16  
17 pressure were assigned as secondary outcome measures.

### 21 Statistical analysis

22  
23 The minimum sample size for this clinical trial was based on results obtained in previous  
24  
25 studies. The mean and standard deviation (SD) for the increase in forearm blood flow induced  
26  
27 by GTN in \*1/\*1 and \*2 allele carriers were reported by Mackenzie et al.<sup>14</sup> Because no data was  
28  
29 available regarding the homozygous \*2/\*2 population, we estimated the mean and SD values  
30  
31 based on an experiment by Chen et al<sup>12</sup> using ALDH2 knockout mice. According to their results,  
32  
33 we assumed that the increase in blood flow in \*1/\*1 and \*2/\*2 genotypes were  $4.5 \pm 3.36$  and  
34  
35  $1.9 \pm 1.99$  (mL/100 mL/min), respectively. Power calculation indicated that the minimum  
36  
37 sample sizes of \*1/\*1 vs. \*2/\*2 carriers were 24:24, 27:19, 30:15, 37:13, or 43:11 to detect the  
38  
39 difference (2.6 mL/100 mL/min) between these two genotypes with a statistical power of 90%  
40  
41 and a P-value of 0.05. The resultant sample size (\*1/\*1, n=47; \*2/\*2, n=22) had an 80% power  
42  
43 to detect a minimal difference of 3.7% in arterial diameter change in response to nitrates  
44  
45 between these groups. Likewise, there was an 80% power to detect a minimal difference of 35  
46  
47 sec in time required for arterial dilation between the two genotypes.

48  
49 Differences in baseline characteristics of participants were compared according to  
50  
51 genotype, using the chi-square test for the categorical variable and one-way analysis of variance  
52  
53 (ANOVA) for continuous variables. Primary outcome measures were displayed according to  
54  
55 genotype group using box-and-whisker plots. Overall group differences in the primary and  
56  
57 secondary outcomes were determined by one-way ANOVA and analysis of covariance  
58  
59 (ANCOVA) with sex, age, body mass index, and systolic blood pressure as covariates. The  
60

1  
2  
3  
4  
5  
6  
7 Tukey-Kramer test was used for multiple comparisons. Differences in outcomes between GTN  
8 and ISDN were also determined by one-way ANOVA and ANCOVA with the same covariates in  
9 each genotype. All data were analysed with SAS version 9.2 (SAS Institute, Cary, USA).  
10  
11  
12  
13 P<0.05 was considered significant.  
14  
15  
16  
17  
18  
19  
20  
21  
22  
23  
24  
25  
26  
27  
28  
29  
30  
31  
32  
33  
34  
35  
36  
37  
38  
39  
40  
41  
42  
43  
44  
45  
46  
47  
48  
49  
50  
51  
52  
53  
54  
55  
56  
57  
58  
59  
60

For peer review only

## RESULTS

The frequency of the ALDH2 \*2 allele is approximately 20% in the Japanese population, although regional differences may exist.<sup>21</sup> The frequencies of each genotype are: \*1/\*1, 60% to 70%; \*1/\*2, 30% to 40%; and \*2/\*2, 3% to 5%. To overcome the difficulty of recruiting enough \*2/\*2 homozygotes by random screening only, we intentionally recruited participants who were unable to drink alcohol by advertisement at Kyushu University. We analysed genotypes of 305 individuals (\*1/\*1, n=156; \*1/\*2, n=111; \*2/\*2, n=38), and included 117 individuals in the trial to fulfil the required sample size (\*1/\*1, n=47; \*1/\*2, n=48; \*2/\*2, n=22). As shown in Table, baseline characteristics did not differ among the genotype groups. We analysed the outcomes from all the participants without loss or exclusion.

Initially we planned to assess the effectiveness of nitrates primarily with two parameters: 1) the maximal rate of increase in brachial artery diameter  $(D_{\max}-D_0)/D_0$ , where  $D_0$  is the diameter at time 0 and  $D_{\max}$  is the maximal diameter achieved after nitrate administration, and 2) the time required to attain maximal dilation ( $T_{\max}$ ).

Unexpectedly, the first parameter  $(D_{\max}-D_0)/D_0$  did not differ among the genotype groups after either treatment (Fig 1), even after adjusting for sex, age, body mass index, and systolic blood pressure. This finding suggests that GTN and ISDN eventually produce the same level of vasodilation regardless of genotype.

We then analysed the second parameter  $T_{\max}$ . As shown in Figure 2, the GTN  $T_{\max}$  was significantly longer in the \*2/\*2 genotype group than in the \*1/\*1 group (crude data,  $P=0.0190$ ; adjusted data,  $P=0.0234$ ), but no significant difference was observed between the \*1/\*1 and \*1/\*2 groups (crude,  $P=0.1390$ ; adjusted,  $P=0.1834$ ). The  $P$  trend among the three genotypes was significant for both crude ( $P=0.004$ ) and adjusted ( $P=0.0002$ ) data. In contrast, ISDN  $T_{\max}$  did not differ among the genotype groups.

The brachial artery typically began to dilate about 1 min after nitrate administration. The diameter rapidly increased until 3 min, after which dilation slowed, and the diameter reached the maximum size at 4 to 6 min. However, it was often not easy to determine  $T_{\max}$ , because the

artery diameter usually approached the maximum size slowly. Thus, an artifact in the trace could significantly affect the determination of  $T_{max}$ . To avoid this problem, we introduced the parameter  $T_{0.9}$ , which is the time point at which arterial diameter reached 90% of the maximal level, to minimise fluctuation of the outcome measure.

As shown in Figure 3, GTN  $T_{0.9}$  was significantly longer in participants with  $*2/*2$  (crude,  $P<0.0001$ ; adjusted,  $P=0.0002$ ) and  $*1/*2$  (crude,  $P=0.0068$ ; adjusted,  $P=0.0157$ ) genotypes than those with  $*1/*1$ . The P trend among the three genotypes was also significant (crude,  $P<0.0001$ ; adjusted,  $P<0.0001$ ). On the other hand, there was no difference in the  $T_{0.9}$  of ISDN.

Next we investigated which organic nitrate was more effective in each ALDH2 genotype. As shown in Figure 1, the effects of GTN and ISDN on  $(D_{max}-D_0)/D_0$  did not differ in any genotype group. In contrast, the  $T_{max}$  of GTN were significantly smaller than that of ISDN in the  $*1/*1$  group (crude,  $P<0.0001$ ; adjusted,  $P<0.0001$ ) and  $*1/*2$  group (crude,  $P<0.0001$ ; adjusted,  $P<0.0001$ ), but no difference was observed between the effects of these nitrates in the  $*2/*2$  group (crude,  $P=0.0972$ ; adjusted,  $P=0.1023$ ) (Fig 2). The  $T_{0.9}$  of GTN was also significantly smaller than that of ISDN in the  $*1/*1$  group (crude,  $P<0.0001$ ; adjusted,  $P<0.0001$ ) and  $*1/*2$  group (crude,  $P=0.0039$ , adjusted,  $P=0.0013$ ), but this value did not differ between the treatments in the  $*2/*2$  group (crude,  $P=0.1996$ , adjusted,  $P=0.3122$ ) (Fig 3).

The results of secondary outcome measures are summarised in Supplement Table. No significant difference was observed in pulse rate, diastolic blood pressure, or systolic blood pressure measured 10 min after nitrate administration among the ALDH2 genotype groups. Further, no serious adverse events were observed throughout the study.

## DISCUSSION

### Principal findings

First, the maximal rate of increase in diameter after GTN treatment did not differ among ALDH2 genotype groups, suggesting that GTN eventually induces maximal vasodilation regardless of genotype. Second, the GTN  $T_{\max}$  was significantly longer in the \*2/\*2 group than in the \*1/\*1 group, and GTN  $T_{0.9}$  was significantly longer in the \*1/\*2 and \*2/\*2 groups than in the \*1/\*1 group, suggesting that the \*1 allele is associated with a more rapid response to GTN. However, this differential response was not observed after ISDN treatment. Third, GTN (0.3 mg) induced vasodilation more rapidly than ISDN (1.25 mg) in the \*1/\*1 and \*1/\*2 groups, but the  $T_{\max}$  and  $T_{0.9}$  values of GTN and ISDN did not differ in the \*2/\*2 group.

### Strengths and limitations of the study

This study was carefully designed and conducted; however, our results require careful interpretation. First, the study participants were not patients with angina. Healthy young volunteers were used because organic nitrates can also induce vasodilation in healthy people. The choice of participants may have strengthened the validity of the study; the participants' backgrounds were likely to be more homogeneous by excluding the influence of multiple concomitant factors that could not be controlled when studying patients or older subjects. In addition, using healthy young participants made it easy to recruit a large enough sample of \*2/\*2 homozygotes. However, results could have been different if the study had used patients with angina, because hemodynamic changes in patients might alter the response to organic nitrates. Second, to minimise bias, a randomised crossover design was used, and arterial diameter was determined by a single measurer blinded to genotype. However, the participants and investigators were not blinded to treatment. Third, arterial diameter was accurately measured using a semiautomatic ultrasonography system.<sup>19 20</sup> However, the brachial artery diameter was measured instead of the coronary artery diameter. Moreover, we did not evaluate venous dilation, although venodilation is thought to be a mechanism that is as important as

coronary artery dilation for the antianginal effects of nitrates.<sup>22 3 23</sup>

### Comparison with other studies

Other than the present study, three previous clinical studies have investigated the influence of the ALDH2 polymorphism on GTN effects, but the study performed by Mackenzie et al<sup>14</sup> was the only experimental study (clinical trial). In that study, GTN was injected into the brachial artery of healthy participants, and forearm blood flow measured by venous occlusion plethysmography was 33% lower if the ALDH2 inhibitor disulfiram was administered. Analysing 16 healthy East Asian participants (\*1/\*1, n=5; \*1/\*2, n=9; \*2/\*2, n=2), they also showed that the effect of GTN was 40% lower in carriers of the \*2 allele than in participants with the \*1/\*1 genotype. However, the analysis did not differentiate between \*1/\*2 and \*2/\*2 genotypes, probably because the sample size was too small. In contrast, the present study included enough participants to allow analysis of the \*2/\*2 population. Moreover, we used ultrasonography to assess arterial dilation, which is a more direct method than plethysmography. The other two studies were both observational studies. Li et al<sup>16</sup> divided 80 Chinese patients with stable angina according to whether pain relief, assessed using a pain judgment scale, was obtained within 10 min after sublingual administration of GTN. ALDH2 genotypes of each group was then analysed, revealing that the effect of GTN was significantly smaller in carriers of the \*2 allele than in participants with the \*1/\*1 genotype. Zhang et al<sup>24</sup> reported that in 142 Chinese patients with coronary heart disease, the rate of efficacious response to GTN was significantly higher in patients with the \*1/\*1 genotype than in those carrying the \*2 allele. However, these studies did not distinguish between the \*1/\*2 and \*2/\*2 genotypes. Moreover, the efficacy of GTN was assessed according to the patients' subjective reporting of symptoms, potentially introducing bias. Therefore, few reliable human studies on the influence of the ALDH2 polymorphisms on the response to GTN were available until our study was conducted; in particular, there was no information about the response to GTN in \*2/\*2 homozygotes.

### Meaning of the study

The results of this study may have clinical implications for the daily use of organic nitrates. First, although there was no significant difference in the magnitude of response to GTN, the delay in attaining near maximal dilation was about 1 min for \*2/\*2 participants who took 0.3 mg GTN. Given that the purpose of GTN is to provide rapid relief for chest pain, we believe that a 1-min delay cannot be ignored; thus ALDH2 should be included in the set of genes analysed for practicing personalised medicine. If gene analysis is not available, a patient's genotype could be estimated by asking about drinking history or using the ethanol patch test.<sup>25</sup> Second, this study suggests the first choice drug for treating angina in terms of ALDH2 polymorphisms. Assuming that a rapid response is better, GTN may still be the first choice for \*1/\*1 patients and perhaps also for \*1/\*2 patients, because GTN dilated the artery more rapidly than ISDN in participants with these genotypes. However, ISDN may be a better choice for \*2/\*2 patients, because it dilated the artery as fast as GTN; moreover, larger or repeated doses of GTN often induce tolerance and oxidative stress.<sup>26</sup> In addition, this study may also be informative for basic research on organic nitrate pharmacology. The maximal rate of diameter increase was comparable among the genotypes. One explanation for this finding is that even the small amount of NO generated by ALDH2 \*2 allele is sufficient for maximal response, because the GTN reductase activity of ALDH2 \*2 is small but not nil.<sup>15</sup> Previously, maximal relaxation of rat aortic rings was shown to occur at only 3.4% of the maximal levels of cGMP obtained with NO.<sup>27</sup> Another, perhaps more likely explanation is that enzymes other than ALDH2, such as glutathione S-transferase,<sup>6,7,28</sup> cytochrome P450,<sup>8,9</sup> and xanthine oxidoreductase,<sup>29</sup> are also involved in the bioactivation of GTN. It has been suggested that ALDH2 activates GTN at the low concentrations achieved by therapeutic doses, whereas cytochrome P450 activates GTN at higher concentrations.<sup>26</sup> However, our results suggest that ALDH2 and other enzymes are concurrently involved in GTN bioactivation, even at low concentrations achieved by the standard therapeutic dose. The other enzymes involved may be able to generate a sufficient amount of NO without ALDH2, whereas ALDH2 specifically may be responsible for the rapid



1  
2  
3  
4  
5  
6  
7 generation of NO.  
8  
9

### 10 **Unanswered questions and future research**

11  
12 First, this study suggested that decreased ALDH2 activity delayed GTN-induced  
13 vasodilation in \*2 allele carriers; however, direct evidence for delayed GTN bioactivation in \*2  
14 allele carriers has not been obtained. Therefore, pharmacokinetic studies evaluating serum  
15 concentrations of GTN and its metabolites are needed to specifically assess whether GTN  
16 metabolism is delayed in \*2 allele carriers. Second, we should also evaluate GTN-induced  
17 venous dilation in \*2 allele carriers, since an in vitro experiment showed that venodilation was  
18 attenuated by pharmacological inhibition of ALDH2.<sup>30</sup> Third, the influence of the ALDH2  
19 polymorphism on the action of GTN should be investigated with a clinical trial of patients with  
20 angina. No clinical trial has been conducted with patients so far; however, the study protocol  
21 should be carefully designed to enable precise determination of outcome measures. Fourth,  
22 basic studies are needed to identify the enzymes other than ALDH2 involved in GTN  
23 metabolism. Finally, the development of new drugs to replace GTN should be promoted.<sup>31 32</sup>  
24 This is not simply because the response to GTN varies among ALDH2 genotypes, but because  
25 repeated or long-term GTN administration may cause nitrate tolerance inactivating ALDH2 by  
26 superoxide generation<sup>33 26 34 35 4</sup> and moreover, inactivated ALDH2 could disturb cardiovascular  
27 cell functions.<sup>36 37</sup>  
28  
29  
30  
31  
32  
33  
34  
35  
36  
37  
38  
39  
40  
41  
42  
43  
44  
45  
46  
47  
48  
49  
50  
51  
52  
53  
54  
55  
56  
57  
58  
59  
60

1  
2  
3  
4  
5  
6  
7 **Acknowledgements** We thank Miyuki Nagamatsu for administrative and technical assistance.  
8  
9

10 **Funding** This work was supported by Grant-in-Aid for Scientific Research from the Ministry of  
11 Education, Culture, Sports, Science and Technology, Japan (grant number 20390160).  
12  
13  
14

15  
16 **Competing interests** TS has received support from the Ministry of Education, Culture, Sports,  
17 Science and Technology, Japan (Grant-in-Aid for Scientific Research No. 20390160).  
18  
19  
20

21  
22 **Ethics approval** The study was approved by the Institutional Review Board for Clinical Trials,  
23 Kyushu University Hospital.  
24  
25  
26

27  
28 **Contributors** TS, KM, HA, and FT-Y conceived and designed the study and wrote the protocol.  
29 SS, TY, HO, and TS recruited participants, obtained informed consent, and acquired the data. FS  
30 determined participants' genotype. SS, TY, KM, and TS analysed and interpreted the data. HA  
31 undertook sample size calculation, randomisation, and statistical analyses. SS and TS drafted  
32 the manuscript. TS obtained funding. All the authors had full access to all the data in the study  
33 and can take responsibility for the integrity of the data and the accuracy of the data analysis. TS  
34 is guarantor.  
35  
36  
37  
38  
39  
40  
41  
42

43  
44 **Data sharing statement** The full study protocol and data will not be publicly accessible.  
45 Interested individuals may contact the authors.  
46  
47  
48  
49  
50  
51  
52  
53  
54  
55  
56  
57  
58  
59  
60

## References

1. Smith E, Hart FD. William Murrell, physician and practical therapist. *Br Med J* 1971; 3: 632-3.
2. Eichler HG, Hiremath A, Katzir D, Blaschke TF, Hoffman BB. Absence of age-related changes in venous responsiveness to nitroglycerin in vivo in humans. *Clin Pharmacol Ther* 1987; 42: 521-4.
3. Torfgård KE, Ahlner J. Mechanisms of action of nitrates. *Cardiovasc Drugs Ther* 1994; 8: 701-17.
4. Mayer B, Beretta M. The enigma of nitroglycerin bioactivation and nitrate tolerance: news, views and troubles. *Br J Pharmacol* 2008; 155: 170-84.
5. Feelisch M, Noack E. Nitric oxide (NO) formation from nitrovasodilators occurs independently of hemoglobin or non-heme iron. *Eur J Pharmacol* 1987; 142: 465-9.
6. Yeates RA, Schmid M, Leitold M. Antagonism of glycerol trinitrate activity by an inhibitor of glutathione S-transferase. *Biochem Pharmacol* 1989; 38: 1749-53.
7. Tsuchida S, Maki T, Sato K. Purification and characterization of glutathione transferases with an activity toward nitroglycerin from human aorta and heart: Multiplicity of the human class Mu forms. *J Biol Chem* 1990; 265: 7150-7.
8. Bennett BM, McDonald BJ, Nigam R, Simon WC. Biotransformation of organic nitrates and vascular smooth muscle cell function. *Trends Pharmacol Sci* 1994; 15: 245-9.
9. Minamiyama Y, Takemura S, Akiyama T, Imaoka S, Inoue M, Funae Y, et al. Isoforms of cytochrome P450 on organic nitrate-derived nitric oxide release in human heart vessels. *FEBS Lett* 1999; 452: 165-9.
10. Chen Z, Zhang J, Stamler JS. Identification of the enzymatic mechanism of nitroglycerin bioactivation. *Proc Natl Acad Sci USA* 2002; 99: 8306-11.
11. Chen Z, Stamler JS. Bioactivation of nitroglycerin by the mitochondrial aldehyde dehydrogenase. *Trends Cardiovasc Med* 2006; 16: 259-65.
12. Chen Z, Foster MW, Zhang J, Mao L, Rockman HA, Kawamoto T, et al. An essential

- 1  
2  
3  
4  
5  
6  
7  
8  
9  
10  
11  
12  
13  
14  
15  
16  
17  
18  
19  
20  
21  
22  
23  
24  
25  
26  
27  
28  
29  
30  
31  
32  
33  
34  
35  
36  
37  
38  
39  
40  
41  
42  
43  
44  
45  
46  
47  
48  
49  
50  
51  
52  
53  
54  
55  
56  
57  
58  
59  
60
- role for mitochondrial aldehyde dehydrogenase in nitroglycerin bioactivation. *Proc Natl Acad Sci USA* 2005; 102: 12159-64.
13. Zhang J, Chen Z, Cobb FR, Stamler JS. Role of mitochondrial aldehyde dehydrogenase in nitroglycerin-induced vasodilation of coronary and systemic vessels: an intact canine model. *Circulation* 2004; 110: 750-5.
14. Mackenzie IS, Maki-Petaja KM, McEniery CM, Bao YP, Wallace SM, Cheriyan J, et al. Aldehyde dehydrogenase 2 plays a role in the bioactivation of nitroglycerin in humans. *Arterioscler Thromb Vasc Biol* 2005; 25: 1891-5.
15. Larson HN, Zhou J, Chen Z, Stamler JS, Weiner H, Hurley TD. Structural and functional consequences of coenzyme binding to the inactive asian variant of mitochondrial aldehyde dehydrogenase: roles of residues 475 and 487. *J Biol Chem* 2007; 282: 12940-50.
16. Li Y, Zhang D, Jin W, Shao C, Yan P, Xu C, et al. Mitochondrial aldehyde dehydrogenase-2 (ALDH2) Glu504Lys polymorphism contributes to the variation in efficacy of sublingual nitroglycerin. *J Clin Invest* 2006; 116: 506-11.
17. Daiber A, Oelze M, Coldewey M, Bachschmid M, Wenzel P, Sydow K, et al. Oxidative stress and mitochondrial aldehyde dehydrogenase activity: a comparison of pentaerythritol tetranitrate with other organic nitrates. *Mol Pharmacol* 2004; 66: 1372-82.
18. Matsumoto M, Nishimura T. Mersenne Twister: a 623-dimensionally equidistributed uniform pseudorandom number generator. *ACM Trans Model Comput Simul* 1998; 8: 3-30.
19. Tomiyama H, Matsumoto C, Yamada J, Teramoto T, Abe K, Ohta H, et al. The relationships of cardiovascular disease risk factors to flow-mediated dilatation in Japanese subjects free of cardiovascular disease. *Hypertens Res* 2008; 31: 2019-25.
20. Inoue T, Matsuoka H, Higashi Y, Ueda S, Sata M, Shimada KE, et al. Flow-mediated vasodilation as a diagnostic modality for vascular failure. *Hypertens Res* 2008; 31: 2105-13.
21. Li H, Borinskaya S, Yoshimura K, Kal'ina N, Marusin A, Stepanov VA, et al. Refined geographic distribution of the oriental ALDH2\*504Lys (nee 487Lys) variant. *Ann Hum Genet* 2009; 73: 335-45.

- 1  
2  
3  
4  
5  
6  
7  
8  
9  
10  
11  
12  
13  
14  
15  
16  
17  
18  
19  
20  
21  
22  
23  
24  
25  
26  
27  
28  
29  
30  
31  
32  
33  
34  
35  
36  
37  
38  
39  
40  
41  
42  
43  
44  
45  
46  
47  
48  
49  
50  
51  
52  
53  
54  
55  
56  
57  
58  
59  
60
22. Tadjkarimi S, O'Neil GS, Luu TN, Allen SP, Schyns CJ, Chester AH, Yacoub MH. Comparison of cyclic GMP in human internal mammary artery and saphenous vein: implications for coronary artery bypass graft patency. *Cardiovasc Res* 1992; 26: 297-300.
23. Abrams J. Beneficial actions of nitrates in cardiovascular disease. *Am J Cardiol* 1996; 77: 31C-7C.
24. Zhang H, Chen YG, Xu F, Xue L, Jiang CX, Zhang Y. The relationship between aldehyde dehydrogenase-2 gene polymorphisms and efficacy of nitroglycerin. *Chin J intern Med* 2007; 46: 629-32.
25. Muramatsu T, Higuchi S, Shigemori K, Saito M, Sasao M, Harada S, et al. Ethanol patch test: a simple and sensitive method for identifying ALDH phenotype. *Alcohol Clin Exp Res* 1989; 13: 229-31.
26. Münzel T, Daiber A, Mülsch A. Explaining the phenomenon of nitrate tolerance. *Circ Res* 2005; 97: 618-28.
27. Kollau A, Hofer A, Russwurm M, Koesling D, Keung WM, Schmidt K, et al. Contribution of aldehyde dehydrogenase to mitochondrial bioactivation of nitroglycerin: evidence for the activation of purified soluble guanylate cyclase through direct formation of nitric oxide. *Biochem J* 2005; 385(Pt 3): 769-77.
28. Zhang XJ, Chang L, Zhang YM, Deng S, Li YJ, Peng J. Comparing the role of glutathione-S-transferase and mitochondrial aldehyde dehydrogenase in nitroglycerin biotransformation and the correlation with calcitonin gene-related peptide. *Eur J Pharmacol* 2009; 61: 97-101.
29. Golwala NH, Hodenette C, Murthy SN, Nossaman BD, Kadowitz PJ. Vascular responses to nitrite are mediated by xanthine oxidoreductase and mitochondrial aldehyde dehydrogenase in the rat. *Can J Physiol Pharmacol* 2009; 87: 1095-101.
30. Huellner MW, Schrepfer S, Weyand M, Weiner H, Wimplinger I, Eschenhagen T, et al. Inhibition of aldehyde dehydrogenase type 2 attenuates vasodilatory action of nitroglycerin in human veins. *FASEB J* 2008; 22: 2561-8.

- 1  
2  
3  
4  
5  
6  
7 31. Schuhmacher S, Schulz E, Oelze M, König A, Roegler C, Lange K, et al. A new class of  
8 organic nitrates: investigations on bioactivation, tolerance and cross-tolerance phenomena.  
9 Br J Pharmacol 2009; 158: 510-20.  
10  
11
- 12 32. Schnorbus B, Schiewe R, Ostad MA, Medler C, Wachtlin D, Wenzel P, et al. Effects of  
13 pentaerythritol tetranitrate on endothelial function in coronary artery disease: results of the  
14 PENTA study. Clin Res Cardiol 2010; 99: 115-24.  
15  
16
- 17 33. DiFabio J, Ji Y, Vasiliou V, Thatcher GR, Bennett BM. Role of mitochondrial aldehyde  
18 dehydrogenase in nitrate tolerance. Mol Pharmacol 2003; 64: 1109-16.  
19  
20
- 21 34. Szöcs K, Lassègue B, Wenzel P, Wendt M, Daiber A, Oelze M, et al. Increased  
22 superoxide production in nitrate tolerance is associated with NAD(P)H oxidase and  
23 aldehyde dehydrogenase 2 downregulation. J Mol Cell Cardiol 2007; 42: 1111-8.  
24  
25
- 26 35. Hink U, Daiber A, Kayhan N, Trischler J, Kraatz C, Oelze M, et al. Oxidative inhibition  
27 of the mitochondrial aldehyde dehydrogenase promotes nitroglycerin tolerance in human  
28 blood vessels. J Am Coll Cardiol 2007; 50: 2226-32.  
29  
30
- 31 36. Daiber A, Oelze M, Wenzel P, Wickramanayake JM, Schuhmacher S, Jansen T, et al.  
32 Nitrate tolerance as a model of vascular dysfunction: roles for mitochondrial aldehyde  
33 dehydrogenase and mitochondrial oxidative stress. Pharmacol Rep 2009; 61: 33-48.  
34  
35
- 36 37. Budas GR, Disatnik MH, Mochly-Rosen D. Aldehyde dehydrogenase 2 in cardiac  
37 protection: a new therapeutic target? Trends Cardiovasc Med 2009; 19: 158-64.  
38  
39  
40  
41  
42  
43  
44  
45  
46  
47  
48  
49  
50  
51  
52  
53  
54  
55  
56  
57  
58  
59  
60

## Figure legends

### Fig 1. Maximal rate of increase in the brachial artery diameter.

After sublingual administration of GTN (0.3 mg) or ISDN (1.25 mg), the brachial artery diameter was continuously measured for 10 min. The maximal rate of increase was calculated by the formula  $(D_{\max}-D_0)/D_0$ , where  $D_0$  was the baseline diameter and  $D_{\max}$  was the maximal diameter achieved. Values of  $(D_{\max}-D_0)/D_0$  after GTN treatment were: total, 0.188 (0.178–0.199); \*1/\*1 genotype, 0.176 (0.163–0.196); \*1/\*2 genotype, 0.195 (0.177–0.210); and \*2/\*2 genotype, 0.196 (0.172–0.221). Values of  $(D_{\max}-D_0)/D_0$  after ISDN treatment were: total, 0.187 (0.178–0.196); \*1/\*1 genotype, 0.183 (0.169–0.199); \*1/\*2 genotype, 0.189 (0.174–0.204); \*2/\*2 genotype, 0.189 (0.167–0.210). Results are shown as box-and-whisker plots indicating the 10th, 25th, 50th, 75th, and 90th percentiles. Group results were compared by one-way ANOVA for crude data and by ANCOVA after adjusting for sex, age, body mass index, and systolic blood pressure.

### Fig 2. Time required to attain maximal dilation ( $T_{\max}$ ).

After sublingual administration of GTN (0.3 mg) or ISDN (1.25 mg), the brachial artery diameter was continuously measured for 10 min. Values of the time when  $D_{\max}$  was achieved ( $T_{\max}$ ) after GTN treatment were: total, 272.6 sec (261.4–284.2 sec); \*1/\*1 genotype, 254.7 sec (238.6–273.4 sec); \*1/\*2 genotype, 277.4 sec (259.4–294.3 sec); \*2/\*2 genotype, 299.7 sec (269.0–330.4 sec).  $T_{\max}$  values after ISDN treatment were: total, 351.4 sec (337.6–368.7 sec); \*1/\*1 genotype, 365.0 sec (340.5–389.9 sec); \*1/\*2 genotype, 340.3 sec (316.2–364.5 sec); \*2/\*2 genotype, 347.0 sec (320.7–391.3 sec). Results for the different genotypes and nitrate treatments are shown as box-and-whisker plots indicating the 10th, 25th, 50th, 75th, and 90th percentiles. Group results were compared by one-way ANOVA for crude data and by ANCOVA after adjusting for sex, age, body mass index, and systolic blood pressure. NS, not significant.

**Fig 3. Time required to attain 90% maximal dilation ( $T_{0.9}$ ).**

After sublingual administration of GTN (0.3 mg) or ISDN (1.25 mg), the brachial artery diameter was continuously measured for 10 min. Values of the time at which the diameter achieved 90%  $D_{\max}$  ( $T_{0.9}$ ) after GTN treatment were: total, 198.3 sec (189.0–207.6 sec); \*1/\*1 genotype, 174.9 sec (161.5–188.3 sec); \*1/\*2 genotype, 206.1 sec (191.7–219.3 sec); \*2/\*2 genotype, 231.4 sec (211.8–251.0 sec).  $T_{0.9}$  values after ISDN treatment: total, 242.0 sec (231.6–254.2 sec); \*1/\*1 genotype, 236.8 sec (220.8–257.0 sec); \*1/\*2 genotype, 244.7 sec (227.0–262.5 sec); \*2/\*2 genotype, 247.4 sec (221.5–273.3 sec). Results for the different genotypes and nitrate treatments are shown as box-and-whisker plots indicating the 10th, 25th, 50th, 75th, and 90th percentiles. Group results were compared by one-way ANOVA for crude data and by ANCOVA after adjusting for sex, age, body mass index, and systolic blood pressure. NS, not significant.



**Table. Baseline characteristics of the participants.**

Demographic and physiologic parameters of the participants were evaluated by chi-square test for sex and by one-way ANOVA for body mass index (BMI), pulse rate (PR), systolic blood pressure (SBP), and diastolic blood pressure (DBP). Results are expressed as mean  $\pm$  SD.

|                | Total            | *1/*1            | *1/*2            | *2/*2            | P    |
|----------------|------------------|------------------|------------------|------------------|------|
| Number         | 117              | 47               | 48               | 22               |      |
| Male (%)       | 72.7             | 72.3             | 70.8             | 77.3             | 0.85 |
| Age (years)    | 26.6 $\pm$ 4.3   | 25.8 $\pm$ 4.0   | 26.8 $\pm$ 4.3   | 28.0 $\pm$ 4.8   | 0.11 |
| Height (cm)    | 167.5 $\pm$ 8.4  | 168.0 $\pm$ 8.5  | 168.1 $\pm$ 8.1  | 165.0 $\pm$ 8.9  | 0.41 |
| Weight (kg)    | 59.6 $\pm$ 9.3   | 59.9 $\pm$ 8.5   | 59.9 $\pm$ 10.4  | 57.7 $\pm$ 8.4   | 0.62 |
| BMI            | 21.2 $\pm$ 2.3   | 21.3 $\pm$ 2.1   | 21.1 $\pm$ 2.7   | 21.1 $\pm$ 1.9   | 0.91 |
| PR (beats/min) | 65.8 $\pm$ 10.9  | 64.5 $\pm$ 10.4  | 64.9 $\pm$ 10.1  | 65.9 $\pm$ 11.7  | 0.99 |
| SBP (mmHg)     | 119.5 $\pm$ 11.8 | 118.4 $\pm$ 13.5 | 117.0 $\pm$ 12.5 | 118.3 $\pm$ 10.9 | 0.60 |
| DBP (mmHg)     | 67.1 $\pm$ 8.4   | 66.7 $\pm$ 8.7   | 65.9 $\pm$ 8.1   | 64.3 $\pm$ 6.8   | 0.42 |

1  
2  
3  
4  
5  
6  
7  
8  
9  
10  
11  
12  
13  
14  
15  
16  
17  
18  
19  
20  
21  
22  
23  
24  
25  
26  
27  
28  
29  
30  
31  
32  
33  
34  
35  
36  
37  
38  
39  
40  
41  
42  
43  
44  
45  
46  
47  
48  
49  
50  
51  
52  
53  
54  
55  
56  
57  
58  
59  
60

Fig.1

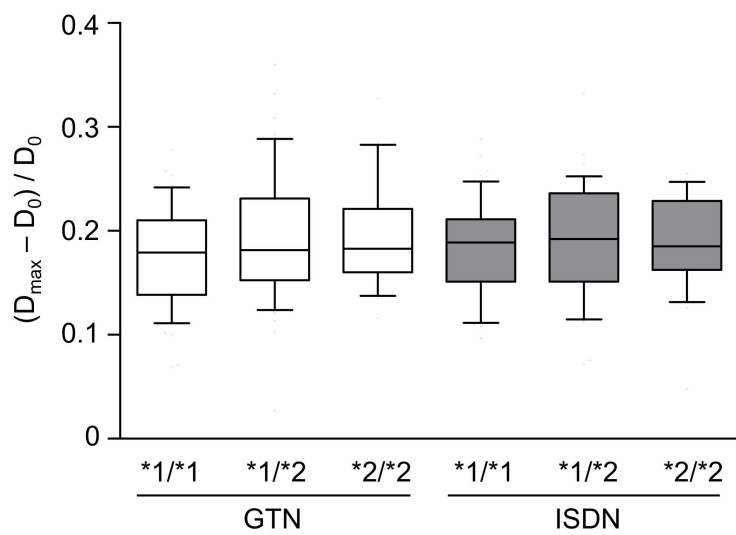

1057x793mm (72 x 72 DPI)

Review only

Fig.2

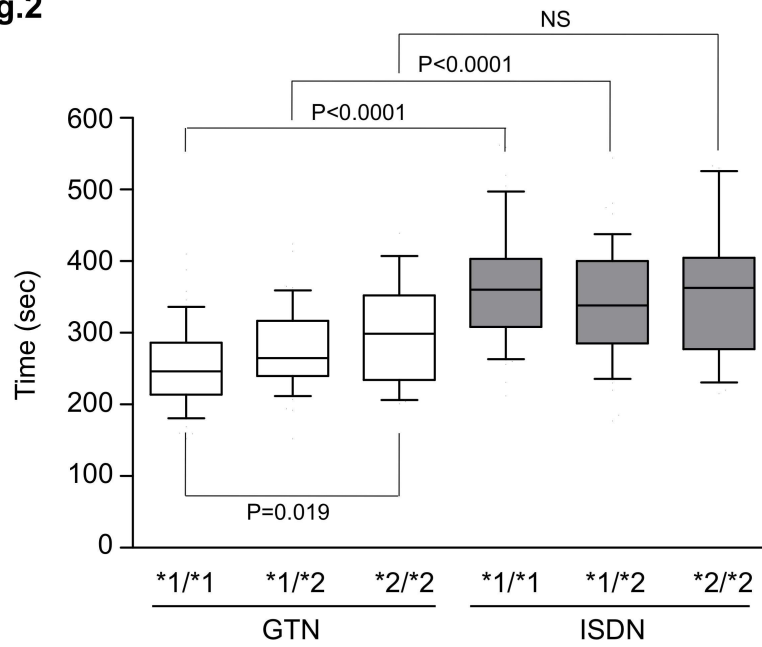

1057x793mm (72 x 72 DPI)

ew only

1  
2  
3  
4  
5  
6  
7  
8  
9  
10  
11  
12  
13  
14  
15  
16  
17  
18  
19  
20  
21  
22  
23  
24  
25  
26  
27  
28  
29  
30  
31  
32  
33  
34  
35  
36  
37  
38  
39  
40  
41  
42  
43  
44  
45  
46  
47  
48  
49  
50  
51  
52  
53  
54  
55  
56  
57  
58  
59  
60

Fig.3

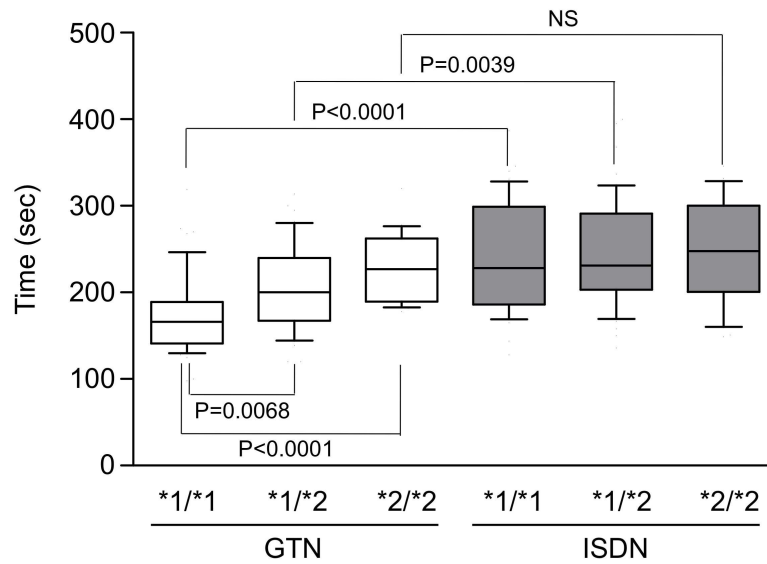

1057x793mm (72 x 72 DPI)

ew only

**Supplement Table. Changes in pulse rate and blood pressure induced by nitrates.**

Pulse rate (PR), systolic blood pressure (SBP), and diastolic blood pressure (DBP) were measured at baseline and 10 min after glyceryl trinitrate (GTN) or isosorbide dinitrate (ISDN) administration. Results are expressed as percentage change and compared by one-way ANOVA.

|      |      | Total        | *1/*1        | *1/*2        | *2/*2        | P    |
|------|------|--------------|--------------|--------------|--------------|------|
| GTN  | %PR  | 0.21±9.32    | 0.13±10.73   | -0.20±8.99   | 1.24±6.71    | 0.84 |
|      | %SBP | -5.69±5.49   | -4.58±5.66   | -6.46±5.41   | -6.42±5.12   | 0.20 |
|      | %DBP | -13.83±9.16  | -12.48±8.98  | -14.43±8.62  | -15.43±10.61 | 0.39 |
| ISDN | %PR  | 1.33±7.45    | 1.73±8.83    | 0.10±6.71    | 3.12±5.48    | 0.26 |
|      | %SBP | -7.27±4.78   | -7.13±4.88   | -6.96±4.67   | -8.23±4.93   | 0.57 |
|      | %DBP | -16.47±10.36 | -17.86±10.45 | -15.61±10.75 | -15.43±9.42  | 0.51 |

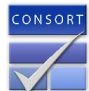

## CONSORT 2010 checklist of information to include when reporting a randomised trial\*

| Section/Topic                    | Item No | Checklist item                                                                                                                                                                              | Reported on page No |
|----------------------------------|---------|---------------------------------------------------------------------------------------------------------------------------------------------------------------------------------------------|---------------------|
| <b>Title and abstract</b>        |         |                                                                                                                                                                                             |                     |
|                                  | 1a      | Identification as a randomised trial in the title                                                                                                                                           | 1                   |
|                                  | 1b      | Structured summary of trial design, methods, results, and conclusions (for specific guidance see CONSORT for abstracts)                                                                     | 2                   |
| <b>Introduction</b>              |         |                                                                                                                                                                                             |                     |
| Background and objectives        | 2a      | Scientific background and explanation of rationale                                                                                                                                          | 5, 6                |
|                                  | 2b      | Specific objectives or hypotheses                                                                                                                                                           | 6                   |
| <b>Methods</b>                   |         |                                                                                                                                                                                             |                     |
| Trial design                     | 3a      | Description of trial design (such as parallel, factorial) including allocation ratio                                                                                                        | 7, 8                |
|                                  | 3b      | Important changes to methods after trial commencement (such as eligibility criteria), with reasons                                                                                          | No changes          |
| Participants                     | 4a      | Eligibility criteria for participants                                                                                                                                                       | 7                   |
|                                  | 4b      | Settings and locations where the data were collected                                                                                                                                        | 7, 8                |
| Interventions                    | 5       | The interventions for each group with sufficient details to allow replication, including how and when they were actually administered                                                       | 8, 9                |
| Outcomes                         | 6a      | Completely defined pre-specified primary and secondary outcome measures, including how and when they were assessed                                                                          | 9                   |
|                                  | 6b      | Any changes to trial outcomes after the trial commenced, with reasons                                                                                                                       | 9, 11, 12           |
| Sample size                      | 7a      | How sample size was determined                                                                                                                                                              | 9                   |
|                                  | 7b      | When applicable, explanation of any interim analyses and stopping guidelines                                                                                                                | Not applicable      |
| <b>Randomisation:</b>            |         |                                                                                                                                                                                             |                     |
| Sequence generation              | 8a      | Method used to generate the random allocation sequence                                                                                                                                      | 8                   |
|                                  | 8b      | Type of randomisation; details of any restriction (such as blocking and block size)                                                                                                         | 8                   |
| Allocation concealment mechanism | 9       | Mechanism used to implement the random allocation sequence (such as sequentially numbered containers), describing any steps taken to conceal the sequence until interventions were assigned | 8                   |
| Implementation                   | 10      | Who generated the random allocation sequence, who enrolled participants, and who assigned participants to interventions                                                                     | 8                   |
| Blinding                         | 11a     | If done, who was blinded after assignment to interventions (for example, participants, care providers, those                                                                                | 8                   |

|                                                      |     |                                                                                                                                                   |                                   |
|------------------------------------------------------|-----|---------------------------------------------------------------------------------------------------------------------------------------------------|-----------------------------------|
|                                                      |     | assessing outcomes) and how                                                                                                                       |                                   |
|                                                      | 11b | If relevant, description of the similarity of interventions                                                                                       | Not relevant                      |
| Statistical methods                                  | 12a | Statistical methods used to compare groups for primary and secondary outcomes                                                                     | 9, 10                             |
|                                                      | 12b | Methods for additional analyses, such as subgroup analyses and adjusted analyses                                                                  | 9, 10                             |
| <b>Results</b>                                       |     |                                                                                                                                                   |                                   |
| Participant flow (a diagram is strongly recommended) | 13a | For each group, the numbers of participants who were randomly assigned, received intended treatment, and were analysed for the primary outcome    | 11                                |
|                                                      | 13b | For each group, losses and exclusions after randomisation, together with reasons                                                                  | 11                                |
| Recruitment                                          | 14a | Dates defining the periods of recruitment and follow-up                                                                                           | 7                                 |
|                                                      | 14b | Why the trial ended or was stopped                                                                                                                | 11                                |
| Baseline data                                        | 15  | A table showing baseline demographic and clinical characteristics for each group                                                                  | 11, Table                         |
| Numbers analysed                                     | 16  | For each group, number of participants (denominator) included in each analysis and whether the analysis was by original assigned groups           | 11                                |
| Outcomes and estimation                              | 17a | For each primary and secondary outcome, results for each group, and the estimated effect size and its precision (such as 95% confidence interval) | 11, 12, Figures 1-3, Suppl. Table |
|                                                      | 17b | For binary outcomes, presentation of both absolute and relative effect sizes is recommended                                                       |                                   |
| Ancillary analyses                                   | 18  | Results of any other analyses performed, including subgroup analyses and adjusted analyses, distinguishing pre-specified from exploratory         | 11, 12                            |
| Harms                                                | 19  | All important harms or unintended effects in each group (for specific guidance see CONSORT for harms)                                             | 12                                |
| <b>Discussion</b>                                    |     |                                                                                                                                                   |                                   |
| Limitations                                          | 20  | Trial limitations, addressing sources of potential bias, imprecision, and, if relevant, multiplicity of analyses                                  | 13, 14                            |
| Generalisability                                     | 21  | Generalisability (external validity, applicability) of the trial findings                                                                         | 14                                |
| Interpretation                                       | 22  | Interpretation consistent with results, balancing benefits and harms, and considering other relevant evidence                                     | 15, 16                            |
| <b>Other information</b>                             |     |                                                                                                                                                   |                                   |
| Registration                                         | 23  | Registration number and name of trial registry                                                                                                    | 2                                 |
| Protocol                                             | 24  | Where the full trial protocol can be accessed, if available                                                                                       | 17                                |
| Funding                                              | 25  | Sources of funding and other support (such as supply of drugs), role of funders                                                                   | 17                                |

\*We strongly recommend reading this statement in conjunction with the CONSORT 2010 Explanation and Elaboration for important clarifications on all the items. If relevant, we also recommend reading CONSORT extensions for cluster randomised trials, non-inferiority and equivalence trials, non-pharmacological treatments, herbal interventions, and pragmatic trials. Additional extensions are forthcoming: for those and for up to date references relevant to this checklist, see [www.consort-statement.org](http://www.consort-statement.org).

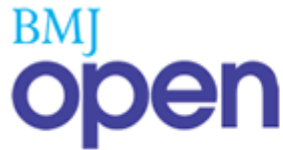

**Differential effects of organic nitrates on arterial diameter among healthy Japanese participants with different mitochondrial aldehyde dehydrogenase 2 genotypes: randomised crossover trial**

|                               |                                                                                                                                                                                                                                                                                                                                                                                                                                                                                                                                                                                                                                                                                                                                                                                                                                                                                |
|-------------------------------|--------------------------------------------------------------------------------------------------------------------------------------------------------------------------------------------------------------------------------------------------------------------------------------------------------------------------------------------------------------------------------------------------------------------------------------------------------------------------------------------------------------------------------------------------------------------------------------------------------------------------------------------------------------------------------------------------------------------------------------------------------------------------------------------------------------------------------------------------------------------------------|
| Journal:                      | <i>BMJ Open</i>                                                                                                                                                                                                                                                                                                                                                                                                                                                                                                                                                                                                                                                                                                                                                                                                                                                                |
| Manuscript ID:                | bmjopen-2011-000133.R1                                                                                                                                                                                                                                                                                                                                                                                                                                                                                                                                                                                                                                                                                                                                                                                                                                                         |
| Article Type:                 | Research                                                                                                                                                                                                                                                                                                                                                                                                                                                                                                                                                                                                                                                                                                                                                                                                                                                                       |
| Date Submitted by the Author: | 03-May-2011                                                                                                                                                                                                                                                                                                                                                                                                                                                                                                                                                                                                                                                                                                                                                                                                                                                                    |
| Complete List of Authors:     | Sakata, Satoko; Kyushu University, Department of Medicine and Clinical Science, Faculty of Medical Sciences<br>Yoshihara, Tatsuya; Kyushu University, Department of Clinical Pharmacology, Faculty of Medical Sciences<br>Arima, Hisatomi; The University of Sydney, George Institute for Global Health<br>Shiraishi, Fumie; Kyushu University, Department of Clinical Pharmacology, Faculty of Medical Sciences<br>Oniki, Hideyuki; Kyushu University, Department of Medicine and Clinical Science, Faculty of Medical Sciences<br>Takahashi-Yanaga, Fumi; Kyushu University, Department of Clinical Pharmacology, Faculty of Medical Sciences<br>Matsumura, Kiyoshi; Kyushu University, Department of Medicine and Clinical Science, Faculty of Medical Sciences<br>Sasaguri, Toshiyuki; Kyushu University, Department of Clinical Pharmacology, Faculty of Medical Sciences |
| <b>Subject Heading</b>:       | Cardiovascular medicine                                                                                                                                                                                                                                                                                                                                                                                                                                                                                                                                                                                                                                                                                                                                                                                                                                                        |
| Keywords:                     | Coronary heart disease < CARDIOLOGY, Ischaemic heart disease < CARDIOLOGY, CLINICAL PHARMACOLOGY, Cardiology < INTERNAL MEDICINE, Vascular medicine < INTERNAL MEDICINE, Clinical trials < THERAPEUTICS                                                                                                                                                                                                                                                                                                                                                                                                                                                                                                                                                                                                                                                                        |
|                               |                                                                                                                                                                                                                                                                                                                                                                                                                                                                                                                                                                                                                                                                                                                                                                                                                                                                                |

SCHOLARONE™  
Manuscripts



1  
2  
3  
4  
5  
6  
7 **Differential effects of organic nitrates on arterial diameter among healthy Japanese**  
8 **participants with different mitochondrial aldehyde dehydrogenase 2 genotypes:**  
9 **randomised crossover trial**  
10  
11

12  
13  
14 Satoko Sakata,<sup>2</sup> Tatsuya Yoshihara,<sup>1</sup> Hisatomi Arima,<sup>3</sup> Fumie Shiraishi,<sup>1</sup> Hideyuki Oniki,<sup>2</sup> Fumi  
15 Takahashi-Yanaga,<sup>1</sup> Kiyoshi Matsumura,<sup>2</sup> Toshiyuki Sasaguri<sup>1</sup>  
16  
17

18  
19  
20  
21 <sup>1</sup>Department of Clinical Pharmacology, Faculty of Medical Sciences, Kyushu University,  
22 Fukuoka 812-8582, Japan  
23

24  
25 <sup>2</sup>Department of Medicine and Clinical Science, Faculty of Medical Sciences, Kyushu University,  
26 Fukuoka 812-8582, Japan  
27

28  
29 <sup>3</sup>George Institute for Global Health, The University of Sydney, Sydney 2050, Australia  
30  
31

32  
33 Correspondence to:

34 Toshiyuki Sasaguri, MD, PhD

35  
36 Department of Clinical Pharmacology, Faculty of Medical Sciences, Kyushu University

37  
38 Maidashi 3-1-1, Higashi-ku, Fukuoka 812-8582, Japan

39  
40 Tel.: +81-92-642-6080 or 6082

41  
42 Fax: +81-92-642-6084

43  
44 E-mail: sasaguri@med.kyushu-u.ac.jp  
45  
46  
47  
48  
49  
50  
51  
52  
53  
54  
55  
56  
57  
58  
59  
60

**ABSTRACT**

**Objectives** To determine whether polymorphisms at codon 487 (\*1, GAA=Glu; \*2, AAA=Lys) of mitochondrial aldehyde dehydrogenase 2 (ALDH2) influence nitroglycerin (glyceryl trinitrate [GTN])-induced vasodilation, and whether GTN or isosorbide dinitrate (ISDN) is a more effective antianginal agent in each ALDH2 genotype.

**Design** Randomised, open-label, crossover trial with 117 healthy Japanese (20–39 years) whose genotypes were determined (\*1/\*1, n=47; \*1/\*2, n=48; \*2/\*2, n=22) was performed at Kyushu University Hospital, Fukuoka, Japan. Participants were randomly assigned to treatment: sublingual spray of GTN (0.3 mg) or ISDN (1.25 mg). After  $\geq 1$  week, measurements were repeated using the other drug. Main outcome measures were the maximal rate of increase in the brachial artery diameter determined by ultrasonography, the time required to attain maximal dilation ( $T_{\max}$ ), and the time required to attain 90% maximal dilation ( $T_{0.9}$ ).

**Results** Maximal artery diameter increase in response to GTN or ISDN did not differ among genotypes. However, GTN  $T_{\max}$  was significantly longer for \*2/\*2 (299.7 sec, 269.0–330.4) than \*1/\*1 (254.7 sec, 238.6–273.4;  $P=0.0190$ ). GTN  $T_{0.9}$  was significantly longer in the \*1/\*2 (206.1 sec, 191.7–219.3) and \*2/\*2 (231.4 sec, 211.8–251.0) genotypes than \*1/\*1 (174.9 sec, 161.5–188.3;  $P=0.0068$ ,  $P<0.0001$ , respectively). In contrast, the time-course of ISDN-induced vasodilation did not differ among genotypes. GTN  $T_{\max}$  and  $T_{0.9}$  among \*1 allele carriers (\*1/\*1 and \*1/\*2) were significantly shorter than those of ISDN, whereas the time course of GTN and ISDN vasodilation did not differ among participants carrying \*2/\*2.

**Conclusions** The amplitude of GTN-induced vasodilation was not influenced by ALDH2 genotype, but response was significantly delayed in \*2 allele carriers, especially \*2/\*2. GTN dilated the artery more quickly than ISDN in \*1/\*1 and \*1/\*2, but not in \*2/\*2.

**Trial registration number** UMIN000001492 (UMIN-CTR database).

## ARTICLE SUMMARY

### Article focus

- There were few reliable human studies on the influence of aldehyde dehydrogenase 2 (ALDH2) polymorphisms at codon 487 on the response to nitroglycerin (GTN). In particular, there was no information about the response to GTN in \*2/\*2 homozygotes.
- It was unclear whether GTN or isosorbide dinitrate (ISDN) is a more effective antianginal agent in each ALDH2 genotype.
- We aimed at comparing vasodilation induced by GTN and ISDN in individuals with different ALDH2 genotypes.

### Key messages

- Maximal rate of increase in arterial diameter after GTN treatment did not differ among ALDH2 genotype groups.
- Time required to attain 90% maximal vasodilation was longer in the \*1/\*2 and \*2/\*2 groups than in the \*1/\*1 group.
- GTN (0.3 mg) induced vasodilation more rapidly than ISDN (1.25 mg) in the \*1/\*1 and \*1/\*2 groups, but there was no difference between GTN and ISDN in the \*2/\*2 group.

### Strengths and limitations of this study

- Choice of healthy young individuals as participants may have strengthened the validity of the study; the participants' backgrounds were likely to be more homogeneous by excluding the influence of multiple concomitant factors that could not be controlled when studying patients or older subjects. However, results could have been different if the study had been performed with patients with angina, because hemodynamic changes in patients might alter the response to nitrates.
- Sublingual spray formulations of nitrates were used instead of tablets to minimise the fluctuation in absorption rate. However, this may have made the dosage slightly unreliable.
- A randomised crossover design was used and arterial diameter was determined by a

1  
2  
3  
4  
5  
6  
7  
8  
9  
10  
11  
12  
13  
14  
15  
16  
17  
18  
19  
20  
21  
22  
23  
24  
25  
26  
27  
28  
29  
30  
31  
32  
33  
34  
35  
36  
37  
38  
39  
40  
41  
42  
43  
44  
45  
46  
47  
48  
49  
50  
51  
52  
53  
54  
55  
56  
57  
58  
59  
60

single measurer blinded to genotype. However, the participants and investigators were not blinded to treatment.

- Arterial diameter was accurately measured using a semiautomatic ultrasonography system. However, the brachial artery diameter was measured instead of the coronary artery diameter, and moreover, we did not evaluate venous dilation.

For peer review only

## INTRODUCTION

Nitroglycerin (glyceryl trinitrate [GTN]) has been the drug of choice to relieve angina pectoris since 1879 when William Murrell published his results on the clinical effect of GTN.<sup>1</sup> However, the effectiveness of GTN is not consistent among individual patients.<sup>2</sup> A sublingual 0.3 mg dose of GTN typically alleviates chest pain, but some patients require a larger dose or repeated administration. The reason for this differential effect may be complex, since several biological processes are involved in mediating the pharmacological effects of GTN. GTN is a prodrug that must be reduced to glyceryl dinitrate to generate nitrite, which is further reduced to nitric oxide (NO). NO is the active metabolite that relaxes vascular smooth muscle by stimulating soluble guanylate cyclase to produce cyclic guanosine monophosphate (cGMP).<sup>3,4</sup> Proposed mechanisms for GTN bioactivation include the non-enzymatic interaction with thiol compounds such as cysteine and N-acetylcysteine<sup>5</sup> and enzymatic reaction such as glutathione S-transferase<sup>6-8</sup> and cytochrome P450;<sup>8,9</sup> however, the relative importance of these mechanisms had not been understood until recently.

In 2002, Chen et al<sup>10</sup> identified mitochondrial aldehyde dehydrogenase 2 (ALDH2) as an important enzyme for GTN bioactivation.<sup>11</sup> They purified a protein fraction able to metabolise <sup>14</sup>C-GTN and sequenced its amino acids.<sup>10</sup> Subsequently, they showed that ALDH2 was essential for GTN metabolism using ALDH2 knockout mice.<sup>12</sup> They performed additional in vivo experiments in dogs to demonstrate the role of ALDH2 in GTN bioactivation.<sup>13</sup> These findings were supported by clinical studies. Mackenzie et al<sup>14</sup> reported that the effect of GTN administered by intra-arterial injection was 33% lower in healthy volunteers if the ALDH2 inhibitor disulfiram was given. The loss-of-function single nucleotide polymorphism at codon 487 of ALDH2, in which Glu (GAA, \*1) is replaced with Lys (AAA, \*2), is common in East Asian populations including Japanese. In an in vitro assay, the GTN reductase activity of ALDH2 \*2 was shown to be two orders of magnitude lower than that of the wild type enzyme.<sup>10</sup> Therefore, Mackenzie et al<sup>14</sup> evaluated the effect of GTN in 11 Asian \*2 allele carriers (\*1/\*2 and \*2/\*2) and found it was 40% lower than its effect in carriers of \*1/\*1. Li et al<sup>16</sup> reported

1  
2  
3  
4  
5  
6  
7 that the effect of sublingual GTN was significantly lower in \*2 allele carriers than in \*1/\*1  
8 carriers among Chinese patients with angina; however, it is unclear whether this decrease in  
9 sensitivity to GTN should be considered in medical practice. Further, the sensitivity to GTN of  
10 \*2/\*2 carriers should be distinguished from that of \*1/\*2 carriers, since the number of \*2/\*2  
11 carriers included in previous studies was too small to be independently analysed. It is unknown  
12 whether another drug may be more effective for \*2/\*2 patients. In Japan, isosorbide dinitrate  
13 (ISDN) is the only alternative to GTN available for sublingual administration during anginal  
14 attacks. Since bioactivation of ISDN appears to be mediated by cytochrome P450 but not  
15 ALDH2,<sup>9 17</sup> we wanted to compare the effectiveness of GTN and ISDN in individuals with  
16 different ALDH2 polymorphisms.  
17  
18  
19  
20  
21  
22  
23  
24  
25  
26

27 To answer these questions, we conducted a randomised crossover study to compare the  
28 vasodilation effect of GTN with that of ISDN in healthy young Japanese participants, including  
29 sufficient numbers of each ALDH2 genotype.  
30  
31  
32  
33  
34  
35  
36  
37  
38  
39  
40  
41  
42  
43  
44  
45  
46  
47  
48  
49  
50  
51  
52  
53  
54  
55  
56  
57  
58  
59  
60

## METHODS

### Study design

From September 2009 to May 2010, we performed this randomised, open-label, crossover trial at Kyushu University Hospital, Fukuoka, Japan with volunteers whose ALDH2 genotypes were determined. After an initial treatment with a standard therapeutic dose of either GTN (0.3 mg) or ISDN (1.25 mg), the brachial artery diameter was continuously measured by ultrasonography. After  $\geq 1$  week, the participants received the other drug, and the measurements were repeated. Main outcome measures were the maximal rate of diameter increase, the time required to attain maximal dilation ( $T_{\max}$ ), and the time required to attain 90% of maximal dilation ( $T_{0.9}$ ).

### Participants

From April 2009 to March 2010, we recruited Japanese men and women (20-39 years old) among the students and staff of Kyushu University for participation in the study, and selected the final participants based on ALDH2 genotype. Persons who met the following criteria were excluded: 1) requiring treatment for a disease, 2) under medical treatment, 3) history of cardiovascular disease, 4) serious liver damage, 5) serious renal damage, 6) pregnancy, 7) history of adverse reaction to an organic nitrate, 8) receiving phosphodiesterase-5 inhibitors (sildenafil, vardenafil, or tadalafil), 9) systolic blood pressure  $< 90$  mmHg, 10) body weight  $< 40$  kg or  $> 90$  kg, or 11) judged to be inappropriate for participation in the study by the principal investigator (TS).

### Genotyping

Genomic DNA was extracted from peripheral blood with a DNA isolation kit (GenTLE™; Takara Bio Inc, Ohtsu, Japan); for the 11 participants who did not wish to have blood drawn, DNA was extracted from saliva with a DNA self-collection kit (Oragene™; DNA Genotek, Ottawa, Canada). DNA extraction was carried out with the kits according to the manufacturers'

1  
2  
3  
4  
5  
6  
7 instructions. ALDH2 genotypes at codon 487 were determined by polymerase chain reaction  
8 (PCR) and restriction fragment length polymorphism analysis. PCR primer sequences were  
9 5'-TTGGTGGCTACAAGATGTCG-3' (forward) and 5'-AAACACTGATGGCCTCAAGC-3'  
10 (reverse). The 324-bp PCR products were digested with *TspRI* (New England BioLabs Inc,  
11 Ipswich, USA) at 65°C for 20 min. The restriction digest cut the \*1 genotype DNA into three  
12 fragments (68, 255, and 1 bp) and the \*2 genotype DNA into two fragments (323 and 1 bp),  
13 which were separated on a 3% agarose gel and visualised with ethidium bromide. Genotypes  
14 were determined by the existence of 255-bp and/or 323-bp fragments.  
15  
16  
17  
18  
19  
20  
21  
22  
23  
24

#### 25 Interventions and outcome measures

26  
27 Participants were prohibited from drinking alcohol and smoking cigarettes the night before  
28 testing, but meals were not restricted. After spending at least 60 min without exercise,  
29 participants were randomly assigned 1:1 to a single sublingual spray administration of GTN (0.3  
30 mg; Myocor<sup>®</sup> spray, Toa Eiyo Ltd, Tokyo, Japan) or ISDN (1.25 mg; Nitorol<sup>®</sup> spray, Eisai Co  
31 Ltd, Tokyo, Japan) as initial treatment. A random allocation sequence was made by HA using  
32 random digits generated by the Mersenne Twister method<sup>18</sup> and conveyed to the investigators  
33 (SS, TY, HO, and TS) by sealed numbered envelopes, one for each participant, with instructions  
34 to use the envelopes in numerical order. Participants rested at least 5 min in a supine position in  
35 a quiet examination room at 24°C, and then the right brachial artery was scanned in a  
36 longitudinal section 1 to 10 cm above the elbow in an arm maintained in the same position  
37 throughout the study, with a 10-MHz linear array transducer probe. To determine the maximal  
38 diameter of the artery, the end-diastolic diameter (length from one side of the media-adventitia  
39 interface to the other side) coincident with the R-wave on a monitoring electrocardiogram was  
40 continuously measured from 30 sec before nitrate administration to 10 min after administration.  
41  
42 This measurement was performed using a semiautomatic high-resolution B-mode ultrasound  
43 imaging system (UNEX EF 18G II, UNEX Corporation, Nagoya, Japan)<sup>19,20</sup> by a single expert  
44 (SS) blinded to genotype and recorded on a hard disk. Pulse rate and blood pressure were  
45  
46  
47  
48  
49  
50  
51  
52  
53  
54  
55  
56  
57  
58  
59  
60



1  
2  
3  
4  
5  
6  
7 measured every 5 min. More than 7 days later, each participant received the other drug, and the  
8  
9 measurements were repeated. The prespecified primary outcome measures were the maximal  
10  
11 rate of increase in brachial artery diameter and the time required to attain maximal dilation  
12  
13 ( $T_{\max}$ ). However, the time required to attain 90% maximal dilation ( $T_{0.9}$ ) was also determined, so  
14  
15 as to minimise fluctuation of the outcome measure. In addition, changes in pulse rate and blood  
16  
17 pressure were assigned as secondary outcome measures.

### 20 21 Statistical analysis

22  
23 The minimum sample size for this clinical trial was based on results obtained in previous  
24  
25 studies. The mean and standard deviation (SD) for the increase in forearm blood flow induced  
26  
27 by GTN in \*1/\*1 and \*2 allele carriers were reported by Mackenzie et al.<sup>14</sup> Because no data was  
28  
29 available regarding the homozygous \*2/\*2 population, we estimated the mean and SD values  
30  
31 based on an experiment by Chen et al<sup>12</sup> using ALDH2 knockout mice. According to their results,  
32  
33 we assumed that the increase in blood flow in \*1/\*1 and \*2/\*2 genotypes were  $4.5 \pm 3.36$  and  
34  
35  $1.9 \pm 1.99$  (mL/100 mL/min), respectively. Power calculation indicated that the minimum  
36  
37 sample sizes of \*1/\*1 vs. \*2/\*2 carriers were 24:24, 27:19, 30:15, 37:13, or 43:11 to detect the  
38  
39 difference (2.6 mL/100 mL/min) between these two genotypes with a statistical power of 90%  
40  
41 and a P-value of 0.05. The resultant sample size (\*1/\*1, n=47; \*2/\*2, n=22) had an 80% power  
42  
43 to detect a minimal difference of 3.7% in arterial diameter change in response to nitrates  
44  
45 between these groups. Likewise, there was an 80% power to detect a minimal difference of 35  
46  
47 sec in time required for arterial dilation between the two genotypes.

48  
49 Differences in baseline characteristics of participants were compared according to  
50  
51 genotype, using the chi-square test for the categorical variable and one-way analysis of variance  
52  
53 (ANOVA) for continuous variables. Primary outcome measures were displayed according to  
54  
55 genotype group using box-and-whisker plots. Overall group differences in the primary and  
56  
57 secondary outcomes were determined by one-way ANOVA and analysis of covariance  
58  
59 (ANCOVA) with sex, age, body mass index, and systolic blood pressure as covariates. The  
60

1  
2  
3  
4  
5  
6  
7 Tukey-Kramer test was used for multiple comparisons. Differences in outcomes between GTN  
8 and ISDN were also determined by one-way ANOVA and ANCOVA with the same covariates in  
9 each genotype. All data were analysed with SAS version 9.2 (SAS Institute, Cary, USA).  
10  
11  
12  
13 P<0.05 was considered significant.  
14  
15  
16  
17  
18  
19  
20  
21  
22  
23  
24  
25  
26  
27  
28  
29  
30  
31  
32  
33  
34  
35  
36  
37  
38  
39  
40  
41  
42  
43  
44  
45  
46  
47  
48  
49  
50  
51  
52  
53  
54  
55  
56  
57  
58  
59  
60

For peer review only

## RESULTS

The frequency of the ALDH2 \*2 allele is approximately 20% in the Japanese population, although regional differences may exist.<sup>21</sup> The frequencies of each genotype are: \*1/\*1, 60% to 70%; \*1/\*2, 30% to 40%; and \*2/\*2, 3% to 5%. To overcome the difficulty of recruiting enough \*2/\*2 homozygotes by random screening only, we intentionally recruited participants who were unable to drink alcohol by advertisement at Kyushu University. We analysed genotypes of 305 individuals (\*1/\*1, n=156; \*1/\*2, n=111; \*2/\*2, n=38), and included 117 individuals in the trial to fulfil the required sample size (\*1/\*1, n=47; \*1/\*2, n=48; \*2/\*2, n=22). As shown in Table, baseline characteristics did not differ among the genotype groups. We analysed the outcomes from all the participants without loss or exclusion.

Initially we planned to assess the effectiveness of nitrates primarily with two parameters: 1) the maximal rate of increase in brachial artery diameter  $(D_{\max}-D_0)/D_0$ , where  $D_0$  is the diameter at time 0 and  $D_{\max}$  is the maximal diameter achieved after nitrate administration, and 2) the time required to attain maximal dilation ( $T_{\max}$ ).

Unexpectedly, the first parameter  $(D_{\max}-D_0)/D_0$  did not differ among the genotype groups after either treatment (Fig 1), even after adjusting for sex, age, body mass index, and systolic blood pressure. This finding suggests that GTN and ISDN eventually produce the same level of vasodilation regardless of genotype.

We then analysed the second parameter  $T_{\max}$ . As shown in Figure 2, the GTN  $T_{\max}$  was significantly longer in the \*2/\*2 genotype group than in the \*1/\*1 group (crude data,  $P=0.0190$ ; adjusted data,  $P=0.0234$ ), but no significant difference was observed between the \*1/\*1 and \*1/\*2 groups (crude,  $P=0.1390$ ; adjusted,  $P=0.1834$ ). The  $P$  trend among the three genotypes was significant for both crude ( $P=0.004$ ) and adjusted ( $P=0.0002$ ) data. In contrast, ISDN  $T_{\max}$  did not differ among the genotype groups.

The brachial artery typically began to dilate about 1 min after nitrate administration. The diameter rapidly increased until 3 min, after which dilation slowed, and the diameter reached the maximum size at 4 to 6 min. However, it was often not easy to determine  $T_{\max}$ , because the

artery diameter usually approached the maximum size slowly. Thus, an artifact in the trace could significantly affect the determination of  $T_{max}$ . To avoid this problem, we introduced the parameter  $T_{0.9}$ , which is the time point at which arterial diameter reached 90% of the maximal level, to minimise fluctuation of the outcome measure.

As shown in Figure 3, GTN  $T_{0.9}$  was significantly longer in participants with \*2/\*2 (crude,  $P<0.0001$ ; adjusted,  $P=0.0002$ ) and \*1/\*2 (crude,  $P=0.0068$ ; adjusted,  $P=0.0157$ ) genotypes than those with \*1/\*1. The P trend among the three genotypes was also significant (crude,  $P<0.0001$ ; adjusted,  $P<0.0001$ ). On the other hand, there was no difference in the  $T_{0.9}$  of ISDN.

A similar result was obtained when the time required for 50% maximal dilation was analysed (Supplement Figure).

Next we investigated which organic nitrate was more effective in each ALDH2 genotype. As shown in Figure 1, the effects of GTN and ISDN on  $(D_{max}-D_0)/D_0$  did not differ in any genotype group. In contrast, the  $T_{max}$  of GTN were significantly smaller than that of ISDN in the \*1/\*1 group (crude,  $P<0.0001$ ; adjusted,  $P<0.0001$ ) and \*1/\*2 group (crude,  $P<0.0001$ ; adjusted,  $P<0.0001$ ), but no difference was observed between the effects of these nitrates in the \*2/\*2 group (crude,  $P=0.0972$ ; adjusted,  $P=0.1023$ ) (Fig 2). The  $T_{0.9}$  of GTN was also significantly smaller than that of ISDN in the \*1/\*1 group (crude,  $P<0.0001$ ; adjusted,  $P<0.0001$ ) and \*1/\*2 group (crude,  $P=0.0039$ , adjusted,  $P=0.0013$ ), but this value did not differ between the treatments in the \*2/\*2 group (crude,  $P=0.1996$ , adjusted,  $P=0.3122$ ) (Fig 3).

The results of secondary outcome measures are summarised in Supplement Table. No significant difference was observed in pulse rate, diastolic blood pressure, or systolic blood pressure measured 10 min after nitrate administration among the ALDH2 genotype groups. Further, no serious adverse events were observed throughout the study.

## DISCUSSION

### Principal findings

First, the maximal rate of increase in diameter after GTN treatment did not differ among ALDH2 genotype groups, suggesting that GTN eventually induces maximal vasodilation regardless of genotype. Second, the GTN  $T_{\max}$  was significantly longer in the \*2/\*2 group than in the \*1/\*1 group, and GTN  $T_{0.9}$  was significantly longer in the \*1/\*2 and \*2/\*2 groups than in the \*1/\*1 group, suggesting that the \*1 allele is associated with a more rapid response to GTN. However, this differential response was not observed after ISDN treatment. Third, GTN (0.3 mg) induced vasodilation more rapidly than ISDN (1.25 mg) in the \*1/\*1 and \*1/\*2 groups, but the  $T_{\max}$  and  $T_{0.9}$  values of GTN and ISDN did not differ in the \*2/\*2 group.

### Strengths and limitations of the study

This study was carefully designed and conducted; however, our results require careful interpretation. First, the study participants were not patients with angina. Healthy young volunteers were used because organic nitrates can also induce vasodilation in healthy people. The choice of participants may have strengthened the validity of the study; the participants' backgrounds were likely to be more homogeneous by excluding the influence of multiple concomitant factors that could not be controlled when studying patients or older subjects. In addition, using healthy young participants made it easy to recruit a large enough sample of \*2/\*2 homozygotes. However, results could have been different if the study had used patients with angina, because hemodynamic changes in patients might alter the response to organic nitrates. Second, we used sublingual spray formulations instead of tablets for both nitrates to minimise the fluctuation in absorption rate. However, on the other hand, this may have made the dosage slightly unreliable,<sup>22</sup> although this would have affected all the participants similarly and therefore should not have biased the results. Third, to minimise bias, a randomised crossover design was used, and arterial diameter was determined by a single measurer blinded to genotype. However, the participants and investigators were not blinded to treatment. Fourth, arterial

1  
2  
3  
4  
5  
6 diameter was accurately measured using a semiautomatic ultrasonography system.<sup>19 20</sup> However,  
7  
8 the brachial artery diameter was measured instead of the coronary artery diameter. Moreover,  
9  
10 we did not evaluate venous dilation, although venodilation is thought to be a mechanism that is  
11  
12 as important as coronary artery dilation for the antianginal effects of nitrates.<sup>23 3 24</sup>  
13  
14  
15

### 16 17 **Comparison with other studies**

18  
19 Other than the present study, three previous clinical studies have investigated the influence  
20  
21 of the ALDH2 polymorphism on GTN effects, but the study performed by Mackenzie et al<sup>14</sup>  
22  
23 was the only experimental study (clinical trial). In that study, GTN was injected into the brachial  
24  
25 artery of healthy participants, and forearm blood flow measured by venous occlusion  
26  
27 plethysmography was 33% lower if the ALDH2 inhibitor disulfiram was administered.  
28  
29 Analysing 16 healthy East Asian participants (\*1/\*1, n=5; \*1/\*2, n=9; \*2/\*2, n=2), they also  
30  
31 showed that the effect of GTN was 40% lower in carriers of the \*2 allele than in participants  
32  
33 with the \*1/\*1 genotype. However, the analysis did not differentiate between \*1/\*2 and \*2/\*2  
34  
35 genotypes, probably because the sample size was too small. In contrast, the present study  
36  
37 included enough participants to allow analysis of the \*2/\*2 population. Moreover, we used  
38  
39 ultrasonography to assess arterial dilation, which is a more direct method than plethysmography.  
40  
41 The other two studies were both observational studies. Li et al<sup>16</sup> divided 80 Chinese patients  
42  
43 with stable angina according to whether pain relief, assessed using a pain judgment scale, was  
44  
45 obtained within 10 min after sublingual administration of GTN. ALDH2 genotypes of each  
46  
47 group was then analysed, revealing that the effect of GTN was significantly smaller in carriers  
48  
49 of the \*2 allele than in participants with the \*1/\*1 genotype. Zhang et al<sup>25</sup> reported that in 142  
50  
51 Chinese patients with coronary heart disease, the rate of efficacious response to GTN was  
52  
53 significantly higher in patients with the \*1/\*1 genotype than in those carrying the \*2 allele.  
54  
55 However, these studies did not distinguish between the \*1/\*2 and \*2/\*2 genotypes. Moreover,  
56  
57 the efficacy of GTN was assessed according to the patients' subjective reporting of symptoms,  
58  
59 potentially introducing bias. Therefore, few reliable human studies on the influence of the  
60

1  
2  
3  
4  
5  
6  
7  
8  
9  
10  
11  
12  
13  
14  
15  
16  
17  
18  
19  
20  
21  
22  
23  
24  
25  
26  
27  
28  
29  
30  
31  
32  
33  
34  
35  
36  
37  
38  
39  
40  
41  
42  
43  
44  
45  
46  
47  
48  
49  
50  
51  
52  
53  
54  
55  
56  
57  
58  
59  
60

ALDH2 polymorphisms on the response to GTN were available until our study was conducted; in particular, there was no information about the response to GTN in \*2/\*2 homozygotes.

Based on the earlier studies, we initially hypothesized that the maximal response to GTN would be reduced in \*2 allele carriers, but the results obtained were different from our expectation. Although the time required to obtain the response was different among the genotype groups, there was no difference in the size of response (The reason for this is discussed later). However, we cannot specify the reason for the difference in the results between earlier studies and ours. Probably multiple factors may be involved: such as study design, sample size, GTN dosage, studied vascular beds, measurement method, or outcome measures.

### Meaning of the study

The results of this study may have clinical implications for the daily use of organic nitrates. First, although there was no significant difference in the magnitude of response to GTN, the delay in attaining near maximal dilation was about 1 min for \*2/\*2 participants who took 0.3 mg GTN. Given that the purpose of GTN is to provide rapid relief for chest pain, we believe that a 1-min delay cannot be ignored, although we observed only brachial artery dilation but not disappearance of the symptom. To practice personalised medicine for patients with angina, it may be useful to know individual ALDH2 genotypes before treatment. If gene analysis is not available, a patient's genotype could be estimated by asking about drinking history or using the ethanol patch test.<sup>26</sup> Second, this study suggests the first choice drug for treating angina in terms of ALDH2 polymorphisms. Assuming that a rapid response is better, GTN may still be the first choice for \*1/\*1 patients and perhaps also for \*1/\*2 patients, because GTN dilated the artery more rapidly than ISDN in participants with these genotypes. However, ISDN may be a better choice for \*2/\*2 patients, because it dilated the artery as fast as GTN; moreover, larger or repeated doses of GTN often induce tolerance and oxidative stress, although ISDN can also cause tolerance.<sup>27</sup> In addition, this study may also be informative for basic research on organic nitrate pharmacology. The maximal rate of diameter increase was comparable among the

1  
2  
3  
4  
5  
6  
7 genotypes. One explanation for this finding is that even the small amount of NO generated by  
8 ALDH2 \*2 allele is sufficient for maximal response, because the GTN reductase activity of  
9 ALDH2 \*2 is small but not nil.<sup>15</sup> Previously, maximal relaxation of rat aortic rings was shown  
10 to occur at only 3.4% of the maximal levels of cGMP obtained with NO.<sup>28</sup> Another, perhaps  
11 more likely explanation is that enzymes other than ALDH2, such as glutathione S-transferase,<sup>6,7</sup>  
12 <sup>29</sup> cytochrome P450,<sup>8,9</sup> and xanthine oxidoreductase,<sup>30</sup> are also involved in the bioactivation of  
13 GTN. It has been suggested that ALDH2 activates GTN at the low concentrations achieved by  
14 therapeutic doses, whereas cytochrome P450 activates GTN at higher concentrations.<sup>27</sup>  
15  
16 However, our results suggest that ALDH2 and other enzymes are concurrently involved in GTN  
17 bioactivation, even at low concentrations achieved by the standard therapeutic dose. The other  
18 enzymes involved may be able to generate a sufficient amount of NO without ALDH2, whereas  
19 ALDH2 specifically may be responsible for the rapid generation of NO.  
20  
21  
22  
23  
24  
25  
26  
27  
28  
29  
30  
31  
32

### 33 **Unanswered questions and future research**

34  
35 First, this study suggested that decreased ALDH2 activity delayed GTN-induced  
36 vasodilation in \*2 allele carriers; however, direct evidence for delayed GTN bioactivation in \*2  
37 allele carriers has not been obtained. Therefore, pharmacokinetic studies evaluating serum  
38 concentrations of GTN and its metabolites are needed to specifically assess whether GTN  
39 metabolism is delayed in \*2 allele carriers. Second, we should also evaluate GTN-induced  
40 venous dilation in \*2 allele carriers, since an in vitro experiment showed that venodilation was  
41 attenuated by pharmacological inhibition of ALDH2.<sup>31</sup> Third, the influence of the ALDH2  
42 polymorphism on the action of GTN should be investigated with a clinical trial of patients with  
43 angina. No clinical trial has been conducted with patients so far; however, the study protocol  
44 should be carefully designed to enable precise determination of outcome measures. Fourth,  
45 basic studies are needed to identify the enzymes other than ALDH2 involved in GTN  
46 metabolism. Finally, **it may be necessary to promote the development of a new medicine that is**  
47 **more beneficial than GTN.**<sup>32,33</sup> This is not simply because the response to GTN varies among  
48  
49  
50  
51  
52  
53  
54  
55  
56  
57  
58  
59  
60



1  
2  
3  
4  
5  
6 ALDH2 genotypes, but because repeated or long-term GTN administration may cause nitrate  
7 tolerance inactivating ALDH2 by superoxide generation<sup>34 27 35 36 4</sup> and moreover, inactivated  
8  
9 ALDH2 could disturb cardiovascular cell functions.<sup>37 38</sup>  
10  
11  
12  
13  
14  
15  
16  
17  
18  
19  
20  
21  
22  
23  
24  
25  
26  
27  
28  
29  
30  
31  
32  
33  
34  
35  
36  
37  
38  
39  
40  
41  
42  
43  
44  
45  
46  
47  
48  
49  
50  
51  
52  
53  
54  
55  
56  
57  
58  
59  
60

For peer review only

1  
2  
3  
4  
5  
6  
7  
8  
9  
10  
11  
12  
13  
14  
15  
16  
17  
18  
19  
20  
21  
22  
23  
24  
25  
26  
27  
28  
29  
30  
31  
32  
33  
34  
35  
36  
37  
38  
39  
40  
41  
42  
43  
44  
45  
46  
47  
48  
49  
50  
51  
52  
53  
54  
55  
56  
57  
58  
59  
60

**Acknowledgements** We thank Miyuki Nagamatsu for administrative and technical assistance.

**Funding** This work was supported by Grant-in-Aid for Scientific Research from the Ministry of Education, Culture, Sports, Science and Technology, Japan (grant number 20390160).

**Competing interests** TS has received support from the Ministry of Education, Culture, Sports, Science and Technology, Japan (Grant-in-Aid for Scientific Research No. 20390160).

**Ethics approval** The study was approved by the Institutional Review Board for Clinical Trials, Kyushu University Hospital.

**Contributors** TS, KM, HA, and FT-Y conceived and designed the study and wrote the protocol. SS, TY, HO, and TS recruited participants, obtained informed consent, and acquired the data. FS determined participants' genotype. SS, TY, KM, and TS analysed and interpreted the data. HA undertook sample size calculation, randomisation, and statistical analyses. SS and TS drafted the manuscript. TS obtained funding. All the authors had full access to all the data in the study and can take responsibility for the integrity of the data and the accuracy of the data analysis. TS is guarantor.

**Data sharing statement** The full study protocol and data will not be publicly accessible. Interested individuals may contact the authors.

## References

1. Smith E, Hart FD. William Murrell, physician and practical therapist. *Br Med J* 1971; 3: 632-3.
2. Eichler HG, Hiremath A, Katzir D, Blaschke TF, Hoffman BB. Absence of age-related changes in venous responsiveness to nitroglycerin in vivo in humans. *Clin Pharmacol Ther* 1987; 42: 521-4.
3. Torfgård KE, Ahlner J. Mechanisms of action of nitrates. *Cardiovasc Drugs Ther* 1994; 8: 701-17.
4. Mayer B, Beretta M. The enigma of nitroglycerin bioactivation and nitrate tolerance: news, views and troubles. *Br J Pharmacol* 2008; 155: 170-84.
5. Feelisch M, Noack E. Nitric oxide (NO) formation from nitrovasodilators occurs independently of hemoglobin or non-heme iron. *Eur J Pharmacol* 1987; 142: 465-9.
6. Yeates RA, Schmid M, Leitold M. Antagonism of glycerol trinitrate activity by an inhibitor of glutathione S-transferase. *Biochem Pharmacol* 1989; 38: 1749-53.
7. Tsuchida S, Maki T, Sato K. Purification and characterization of glutathione transferases with an activity toward nitroglycerin from human aorta and heart: Multiplicity of the human class Mu forms. *J Biol Chem* 1990; 265: 7150-7.
8. Bennett BM, McDonald BJ, Nigam R, Simon WC. Biotransformation of organic nitrates and vascular smooth muscle cell function. *Trends Pharmacol Sci* 1994; 15: 245-9.
9. Minamiyama Y, Takemura S, Akiyama T, Imaoka S, Inoue M, Funae Y, et al. Isoforms of cytochrome P450 on organic nitrate-derived nitric oxide release in human heart vessels. *FEBS Lett* 1999; 452: 165-9.
10. Chen Z, Zhang J, Stamler JS. Identification of the enzymatic mechanism of nitroglycerin bioactivation. *Proc Natl Acad Sci USA* 2002; 99: 8306-11.
11. Chen Z, Stamler JS. Bioactivation of nitroglycerin by the mitochondrial aldehyde dehydrogenase. *Trends Cardiovasc Med* 2006; 16: 259-65.
12. Chen Z, Foster MW, Zhang J, Mao L, Rockman HA, Kawamoto T, et al. An essential

- 1  
2  
3  
4  
5  
6  
7  
8  
9  
10  
11  
12  
13  
14  
15  
16  
17  
18  
19  
20  
21  
22  
23  
24  
25  
26  
27  
28  
29  
30  
31  
32  
33  
34  
35  
36  
37  
38  
39  
40  
41  
42  
43  
44  
45  
46  
47  
48  
49  
50  
51  
52  
53  
54  
55  
56  
57  
58  
59  
60
- role for mitochondrial aldehyde dehydrogenase in nitroglycerin bioactivation. *Proc Natl Acad Sci USA* 2005; 102: 12159-64.
13. Zhang J, Chen Z, Cobb FR, Stamler JS. Role of mitochondrial aldehyde dehydrogenase in nitroglycerin-induced vasodilation of coronary and systemic vessels: an intact canine model. *Circulation* 2004; 110: 750-5.
14. Mackenzie IS, Maki-Petaja KM, McEniery CM, Bao YP, Wallace SM, Cheriyan J, et al. Aldehyde dehydrogenase 2 plays a role in the bioactivation of nitroglycerin in humans. *Arterioscler Thromb Vasc Biol* 2005; 25: 1891-5.
15. Larson HN, Zhou J, Chen Z, Stamler JS, Weiner H, Hurley TD. Structural and functional consequences of coenzyme binding to the inactive asian variant of mitochondrial aldehyde dehydrogenase: roles of residues 475 and 487. *J Biol Chem* 2007; 282: 12940-50.
16. Li Y, Zhang D, Jin W, Shao C, Yan P, Xu C, et al. Mitochondrial aldehyde dehydrogenase-2 (ALDH2) Glu504Lys polymorphism contributes to the variation in efficacy of sublingual nitroglycerin. *J Clin Invest* 2006; 116: 506-11.
17. Daiber A, Oelze M, Coldewey M, Bachschmid M, Wenzel P, Sydow K, et al. Oxidative stress and mitochondrial aldehyde dehydrogenase activity: a comparison of pentaerythritol tetranitrate with other organic nitrates. *Mol Pharmacol* 2004; 66: 1372-82.
18. Matsumoto M, Nishimura T. Mersenne Twister: a 623-dimensionally equidistributed uniform pseudorandom number generator. *ACM Trans Model Comput Simul* 1998; 8: 3-30.
19. Tomiyama H, Matsumoto C, Yamada J, Teramoto T, Abe K, Ohta H, et al. The relationships of cardiovascular disease risk factors to flow-mediated dilatation in Japanese subjects free of cardiovascular disease. *Hypertens Res* 2008; 31: 2019-25.
20. Inoue T, Matsuoka H, Higashi Y, Ueda S, Sata M, Shimada KE, et al. Flow-mediated vasodilation as a diagnostic modality for vascular failure. *Hypertens Res* 2008; 31: 2105-13.
21. Li H, Borinskaya S, Yoshimura K, Kal'ina N, Marusin A, Stepanov VA, et al. Refined geographic distribution of the oriental ALDH2\*504Lys (nee 487Lys) variant. *Ann Hum Genet* 2009; 73: 335-45.

- 1  
2  
3  
4  
5  
6  
7  
8  
9  
10  
11  
12  
13  
14  
15  
16  
17  
18  
19  
20  
21  
22  
23  
24  
25  
26  
27  
28  
29  
30  
31  
32  
33  
34  
35  
36  
37  
38  
39  
40  
41  
42  
43  
44  
45  
46  
47  
48  
49  
50  
51  
52  
53  
54  
55  
56  
57  
58  
59  
60
22. Price JW, Price JR. Accuracy and precision of metered doses of nitroglycerin lingual spray. *Am J Health Syst Pharm* 2008; 65: 1556-9.
23. Tadjkarimi S, O'Neil GS, Luu TN, Allen SP, Schyns CJ, Chester AH, Yacoub MH. Comparison of cyclic GMP in human internal mammary artery and saphenous vein: implications for coronary artery bypass graft patency. *Cardiovasc Res* 1992; 26: 297-300.
24. Abrams J. Beneficial actions of nitrates in cardiovascular disease. *Am J Cardiol* 1996; 77: 31C-7C.
25. Zhang H, Chen YG, Xu F, Xue L, Jiang CX, Zhang Y. The relationship between aldehyde dehydrogenase-2 gene polymorphisms and efficacy of nitroglycerin. *Chin J intern Med* 2007; 46: 629-32.
26. Muramatsu T, Higuchi S, Shigemori K, Saito M, Sasao M, Harada S, et al. Ethanol patch test: a simple and sensitive method for identifying ALDH phenotype. *Alcohol Clin Exp Res* 1989; 13: 229-31.
27. Münzel T, Daiber A, Mülsch A. Explaining the phenomenon of nitrate tolerance. *Circ Res* 2005; 97: 618-28.
28. Kollau A, Hofer A, Russwurm M, Koesling D, Keung WM, Schmidt K, et al. Contribution of aldehyde dehydrogenase to mitochondrial bioactivation of nitroglycerin: evidence for the activation of purified soluble guanylate cyclase through direct formation of nitric oxide. *Biochem J* 2005; 385(Pt 3): 769-77.
29. Zhang XJ, Chang L, Zhang YM, Deng S, Li YJ, Peng J. Comparing the role of glutathione-S-transferase and mitochondrial aldehyde dehydrogenase in nitroglycerin biotransformation and the correlation with calcitonin gene-related peptide. *Eur J Pharmacol* 2009; 61: 97-101.
30. Golwala NH, Hodenette C, Murthy SN, Nossaman BD, Kadowitz PJ. Vascular responses to nitrite are mediated by xanthine oxidoreductase and mitochondrial aldehyde dehydrogenase in the rat. *Can J Physiol Pharmacol* 2009; 87: 1095-101.
31. Huellner MW, Schrepfer S, Weyand M, Weiner H, Wimplinger I, Eschenhagen T, et al.

- 1  
2  
3  
4  
5  
6  
7  
8  
9  
10  
11  
12  
13  
14  
15  
16  
17  
18  
19  
20  
21  
22  
23  
24  
25  
26  
27  
28  
29  
30  
31  
32  
33  
34  
35  
36  
37  
38  
39  
40  
41  
42  
43  
44  
45  
46  
47  
48  
49  
50  
51  
52  
53  
54  
55  
56  
57  
58  
59  
60
- Inhibition of aldehyde dehydrogenase type 2 attenuates vasodilatory action of nitroglycerin in human veins. *FASEB J* 2008; 22: 2561-8.
32. Schuhmacher S, Schulz E, Oelze M, König A, Roegler C, Lange K, et al. A new class of organic nitrates: investigations on bioactivation, tolerance and cross-tolerance phenomena. *Br J Pharmacol* 2009; 158: 510-20.
33. Schnorbus B, Schiewe R, Ostad MA, Medler C, Wachtlin D, Wenzel P, et al. Effects of pentaerythritol tetranitrate on endothelial function in coronary artery disease: results of the PENTA study. *Clin Res Cardiol* 2010; 99: 115-24.
34. DiFabio J, Ji Y, Vasiliou V, Thatcher GR, Bennett BM. Role of mitochondrial aldehyde dehydrogenase in nitrate tolerance. *Mol Pharmacol* 2003; 64: 1109-16.
35. Szöcs K, Lassègue B, Wenzel P, Wendt M, Daiber A, Oelze M, et al. Increased superoxide production in nitrate tolerance is associated with NAD(P)H oxidase and aldehyde dehydrogenase 2 downregulation. *J Mol Cell Cardiol* 2007; 42: 1111-8.
36. Hink U, Daiber A, Kayhan N, Trischler J, Kraatz C, Oelze M, et al. Oxidative inhibition of the mitochondrial aldehyde dehydrogenase promotes nitroglycerin tolerance in human blood vessels. *J Am Coll Cardiol* 2007; 50: 2226-32.
37. Daiber A, Oelze M, Wenzel P, Wickramanayake JM, Schuhmacher S, Jansen T, et al. Nitrate tolerance as a model of vascular dysfunction: roles for mitochondrial aldehyde dehydrogenase and mitochondrial oxidative stress. *Pharmacol Rep* 2009; 61: 33-48.
38. Budas GR, Disatnik MH, Mochly-Rosen D. Aldehyde dehydrogenase 2 in cardiac protection: a new therapeutic target? *Trends Cardiovasc Med* 2009; 19: 158-64.

## Figure legends

### Fig 1. Maximal rate of increase in the brachial artery diameter.

After sublingual administration of GTN (0.3 mg) or ISDN (1.25 mg), the brachial artery diameter was continuously measured for 10 min. The maximal rate of increase was calculated by the formula  $(D_{\max}-D_0)/D_0$ , where  $D_0$  was the baseline diameter and  $D_{\max}$  was the maximal diameter achieved. Values of  $(D_{\max}-D_0)/D_0$  after GTN treatment were: total, 0.188 (0.178–0.199); \*1/\*1 genotype, 0.176 (0.163–0.196); \*1/\*2 genotype, 0.195 (0.177–0.210); and \*2/\*2 genotype, 0.196 (0.172–0.221). Values of  $(D_{\max}-D_0)/D_0$  after ISDN treatment were: total, 0.187 (0.178–0.196); \*1/\*1 genotype, 0.183 (0.169–0.199); \*1/\*2 genotype, 0.189 (0.174–0.204); \*2/\*2 genotype, 0.189 (0.167–0.210). Results are shown as box-and-whisker plots indicating the 10th, 25th, 50th, 75th, and 90th percentiles. Group results were compared by one-way ANOVA for crude data and by ANCOVA after adjusting for sex, age, body mass index, and systolic blood pressure.

### Fig 2. Time required to attain maximal dilation ( $T_{\max}$ ).

After sublingual administration of GTN (0.3 mg) or ISDN (1.25 mg), the brachial artery diameter was continuously measured for 10 min. Values of the time when  $D_{\max}$  was achieved ( $T_{\max}$ ) after GTN treatment were: total, 272.6 sec (261.4–284.2 sec); \*1/\*1 genotype, 254.7 sec (238.6–273.4 sec); \*1/\*2 genotype, 277.4 sec (259.4–294.3 sec); \*2/\*2 genotype, 299.7 sec (269.0–330.4 sec).  $T_{\max}$  values after ISDN treatment were: total, 351.4 sec (337.6–368.7 sec); \*1/\*1 genotype, 365.0 sec (340.5–389.9 sec); \*1/\*2 genotype, 340.3 sec (316.2–364.5 sec); \*2/\*2 genotype, 347.0 sec (320.7–391.3 sec). Results for the different genotypes and nitrate treatments are shown as box-and-whisker plots indicating the 10th, 25th, 50th, 75th, and 90th percentiles. Group results were compared by one-way ANOVA for crude data and by ANCOVA after adjusting for sex, age, body mass index, and systolic blood pressure. **NS, not significant.**

**Fig 3. Time required to attain 90% maximal dilation ( $T_{0.9}$ ).**

After sublingual administration of GTN (0.3 mg) or ISDN (1.25 mg), the brachial artery diameter was continuously measured for 10 min. Values of the time at which the diameter achieved 90%  $D_{\max}$  ( $T_{0.9}$ ) after GTN treatment were: total, 198.3 sec (189.0–207.6 sec); \*1/\*1 genotype, 174.9 sec (161.5–188.3 sec); \*1/\*2 genotype, 206.1 sec (191.7–219.3 sec); \*2/\*2 genotype, 231.4 sec (211.8–251.0 sec).  $T_{0.9}$  values after ISDN treatment: total, 242.0 sec (231.6–254.2 sec); \*1/\*1 genotype, 236.8 sec (220.8–257.0 sec); \*1/\*2 genotype, 244.7 sec (227.0–262.5 sec); \*2/\*2 genotype, 247.4 sec (221.5–273.3 sec). Results for the different genotypes and nitrate treatments are shown as box-and-whisker plots indicating the 10th, 25th, 50th, 75th, and 90th percentiles. Group results were compared by one-way ANOVA for crude data and by ANCOVA after adjusting for sex, age, body mass index, and systolic blood pressure.

~~NS, not significant.~~



**Table. Baseline characteristics of the participants.**

Demographic and physiologic parameters of the participants were evaluated by chi-square test for sex and by one-way ANOVA for body mass index (BMI), pulse rate (PR), systolic blood pressure (SBP), and diastolic blood pressure (DBP). Results are expressed as mean  $\pm$  SD.

|                | Total            | *1/*1            | *1/*2            | *2/*2            | P    |
|----------------|------------------|------------------|------------------|------------------|------|
| Number         | 117              | 47               | 48               | 22               |      |
| Male (%)       | 72.7             | 72.3             | 70.8             | 77.3             | 0.85 |
| Age (years)    | 26.6 $\pm$ 4.3   | 25.8 $\pm$ 4.0   | 26.8 $\pm$ 4.3   | 28.0 $\pm$ 4.8   | 0.11 |
| Height (cm)    | 167.5 $\pm$ 8.4  | 168.0 $\pm$ 8.5  | 168.1 $\pm$ 8.1  | 165.0 $\pm$ 8.9  | 0.41 |
| Weight (kg)    | 59.6 $\pm$ 9.3   | 59.9 $\pm$ 8.5   | 59.9 $\pm$ 10.4  | 57.7 $\pm$ 8.4   | 0.62 |
| BMI            | 21.2 $\pm$ 2.3   | 21.3 $\pm$ 2.1   | 21.1 $\pm$ 2.7   | 21.1 $\pm$ 1.9   | 0.91 |
| PR (beats/min) | 65.8 $\pm$ 10.9  | 64.5 $\pm$ 10.4  | 64.9 $\pm$ 10.1  | 65.9 $\pm$ 11.7  | 0.99 |
| SBP (mmHg)     | 119.5 $\pm$ 11.8 | 118.4 $\pm$ 13.5 | 117.0 $\pm$ 12.5 | 118.3 $\pm$ 10.9 | 0.60 |
| DBP (mmHg)     | 67.1 $\pm$ 8.4   | 66.7 $\pm$ 8.7   | 65.9 $\pm$ 8.1   | 64.3 $\pm$ 6.8   | 0.42 |

Fig. 1

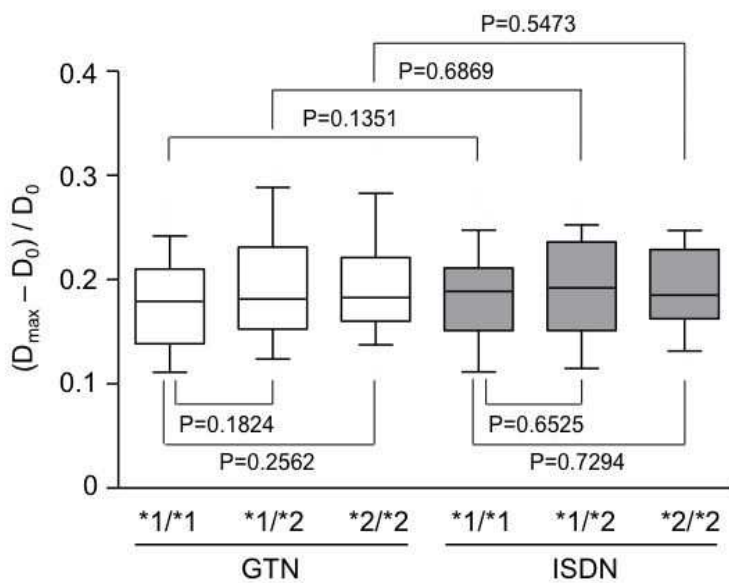

60x45mm (300 x 300 DPI)

View only

1  
2  
3  
4  
5  
6  
7  
8  
9  
10  
11  
12  
13  
14  
15  
16  
17  
18  
19  
20  
21  
22  
23  
24  
25  
26  
27  
28  
29  
30  
31  
32  
33  
34  
35  
36  
37  
38  
39  
40  
41  
42  
43  
44  
45  
46  
47  
48  
49  
50  
51  
52  
53  
54  
55  
56  
57  
58  
59  
60

Fig. 2

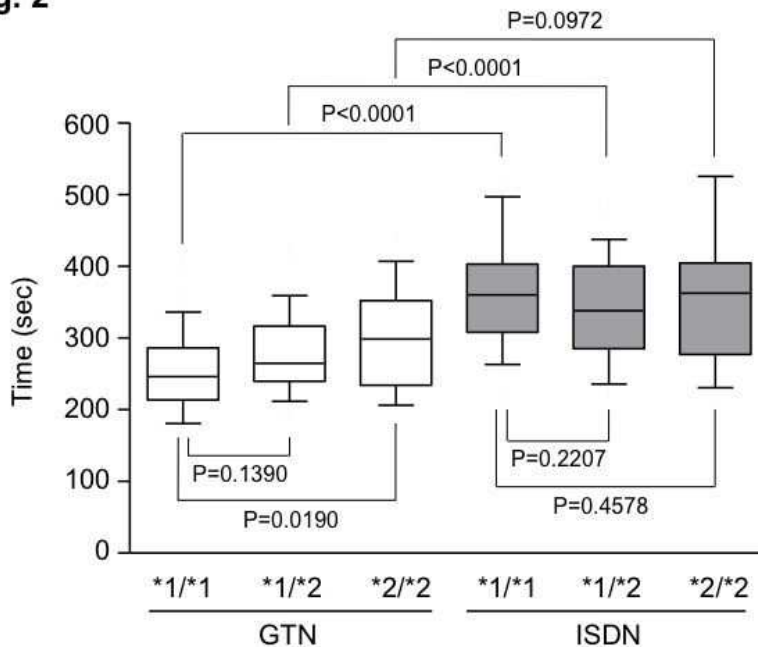

60x45mm (300 x 300 DPI)

View only

Fig. 3

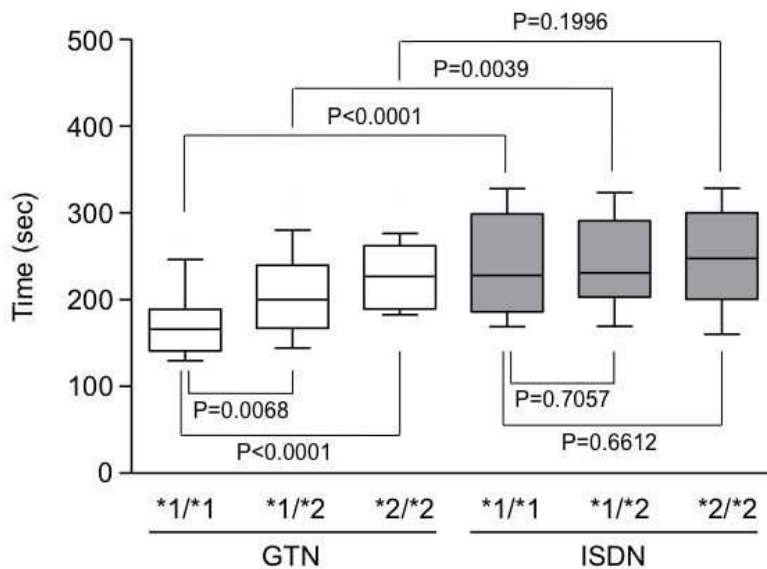

60x45mm (300 x 300 DPI)

Review only

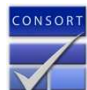

## CONSORT 2010 checklist of information to include when reporting a randomised trial\*

| Section/Topic                    | Item No | Checklist item                                                                                                                                                                              | Reported on page No |
|----------------------------------|---------|---------------------------------------------------------------------------------------------------------------------------------------------------------------------------------------------|---------------------|
| <b>Title and abstract</b>        |         |                                                                                                                                                                                             |                     |
|                                  | 1a      | Identification as a randomised trial in the title                                                                                                                                           | 1                   |
|                                  | 1b      | Structured summary of trial design, methods, results, and conclusions (for specific guidance see CONSORT for abstracts)                                                                     | 2                   |
| <b>Introduction</b>              |         |                                                                                                                                                                                             |                     |
| Background and objectives        | 2a      | Scientific background and explanation of rationale                                                                                                                                          | 5, 6                |
|                                  | 2b      | Specific objectives or hypotheses                                                                                                                                                           | 6                   |
| <b>Methods</b>                   |         |                                                                                                                                                                                             |                     |
| Trial design                     | 3a      | Description of trial design (such as parallel, factorial) including allocation ratio                                                                                                        | 7, 8                |
|                                  | 3b      | Important changes to methods after trial commencement (such as eligibility criteria), with reasons                                                                                          | No changes          |
| Participants                     | 4a      | Eligibility criteria for participants                                                                                                                                                       | 7                   |
|                                  | 4b      | Settings and locations where the data were collected                                                                                                                                        | 7, 8                |
| Interventions                    | 5       | The interventions for each group with sufficient details to allow replication, including how and when they were actually administered                                                       | 8, 9                |
| Outcomes                         | 6a      | Completely defined pre-specified primary and secondary outcome measures, including how and when they were assessed                                                                          | 9                   |
|                                  | 6b      | Any changes to trial outcomes after the trial commenced, with reasons                                                                                                                       | 9, 11, 12           |
| Sample size                      | 7a      | How sample size was determined                                                                                                                                                              | 9                   |
|                                  | 7b      | When applicable, explanation of any interim analyses and stopping guidelines                                                                                                                | Not applicable      |
| <b>Randomisation:</b>            |         |                                                                                                                                                                                             |                     |
| Sequence generation              | 8a      | Method used to generate the random allocation sequence                                                                                                                                      | 8                   |
|                                  | 8b      | Type of randomisation; details of any restriction (such as blocking and block size)                                                                                                         | 8                   |
| Allocation concealment mechanism | 9       | Mechanism used to implement the random allocation sequence (such as sequentially numbered containers), describing any steps taken to conceal the sequence until interventions were assigned | 8                   |
| Implementation                   | 10      | Who generated the random allocation sequence, who enrolled participants, and who assigned participants to interventions                                                                     | 8                   |
| Blinding                         | 11a     | If done, who was blinded after assignment to interventions (for example, participants, care providers, those                                                                                | 8                   |

|                                                      |     |                                                                                                                                                   |                                                                |
|------------------------------------------------------|-----|---------------------------------------------------------------------------------------------------------------------------------------------------|----------------------------------------------------------------|
|                                                      |     | assessing outcomes) and how                                                                                                                       |                                                                |
|                                                      | 11b | If relevant, description of the similarity of interventions                                                                                       | Not relevant                                                   |
| Statistical methods                                  | 12a | Statistical methods used to compare groups for primary and secondary outcomes                                                                     | 9, 10                                                          |
|                                                      | 12b | Methods for additional analyses, such as subgroup analyses and adjusted analyses                                                                  | 9, 10                                                          |
| <b>Results</b>                                       |     |                                                                                                                                                   |                                                                |
| Participant flow (a diagram is strongly recommended) | 13a | For each group, the numbers of participants who were randomly assigned, received intended treatment, and were analysed for the primary outcome    | 11                                                             |
|                                                      | 13b | For each group, losses and exclusions after randomisation, together with reasons                                                                  | 11                                                             |
| Recruitment                                          | 14a | Dates defining the periods of recruitment and follow-up                                                                                           | 7                                                              |
|                                                      | 14b | Why the trial ended or was stopped                                                                                                                | 11                                                             |
| Baseline data                                        | 15  | A table showing baseline demographic and clinical characteristics for each group                                                                  | 11, Table                                                      |
| Numbers analysed                                     | 16  | For each group, number of participants (denominator) included in each analysis and whether the analysis was by original assigned groups           | 11                                                             |
| Outcomes and estimation                              | 17a | For each primary and secondary outcome, results for each group, and the estimated effect size and its precision (such as 95% confidence interval) | 11, 12, Figs. 1-3, Suppl. Table, <a href="#">Suppl. Figure</a> |
|                                                      | 17b | For binary outcomes, presentation of both absolute and relative effect sizes is recommended                                                       |                                                                |
| Ancillary analyses                                   | 18  | Results of any other analyses performed, including subgroup analyses and adjusted analyses, distinguishing pre-specified from exploratory         | 11, 12                                                         |
| Harms                                                | 19  | All important harms or unintended effects in each group (for specific guidance see CONSORT for harms)                                             | 12                                                             |
| <b>Discussion</b>                                    |     |                                                                                                                                                   |                                                                |
| Limitations                                          | 20  | Trial limitations, addressing sources of potential bias, imprecision, and, if relevant, multiplicity of analyses                                  | 13, 14                                                         |
| Generalisability                                     | 21  | Generalisability (external validity, applicability) of the trial findings                                                                         | 14, 15                                                         |
| Interpretation                                       | 22  | Interpretation consistent with results, balancing benefits and harms, and considering other relevant evidence                                     | 15, 16                                                         |
| <b>Other information</b>                             |     |                                                                                                                                                   |                                                                |
| Registration                                         | 23  | Registration number and name of trial registry                                                                                                    | 2                                                              |
| Protocol                                             | 24  | Where the full trial protocol can be accessed, if available                                                                                       | 18                                                             |
| Funding                                              | 25  | Sources of funding and other support (such as supply of drugs), role of funders                                                                   | 18                                                             |

\*We strongly recommend reading this statement in conjunction with the CONSORT 2010 Explanation and Elaboration for important clarifications on all the items. If relevant, we also recommend reading CONSORT extensions for cluster randomised trials, non-inferiority and equivalence trials, non-pharmacological treatments, herbal interventions, and pragmatic trials. Additional extensions are forthcoming: for those and for up to date references relevant to this checklist, see [www.consort-statement.org](http://www.consort-statement.org).
